# Supplementary material
Source: JCI journal article supplement (doi:10.1172/jci189420)
Supplement: sd2 [file 2]

Unedited blot for Figure 4A

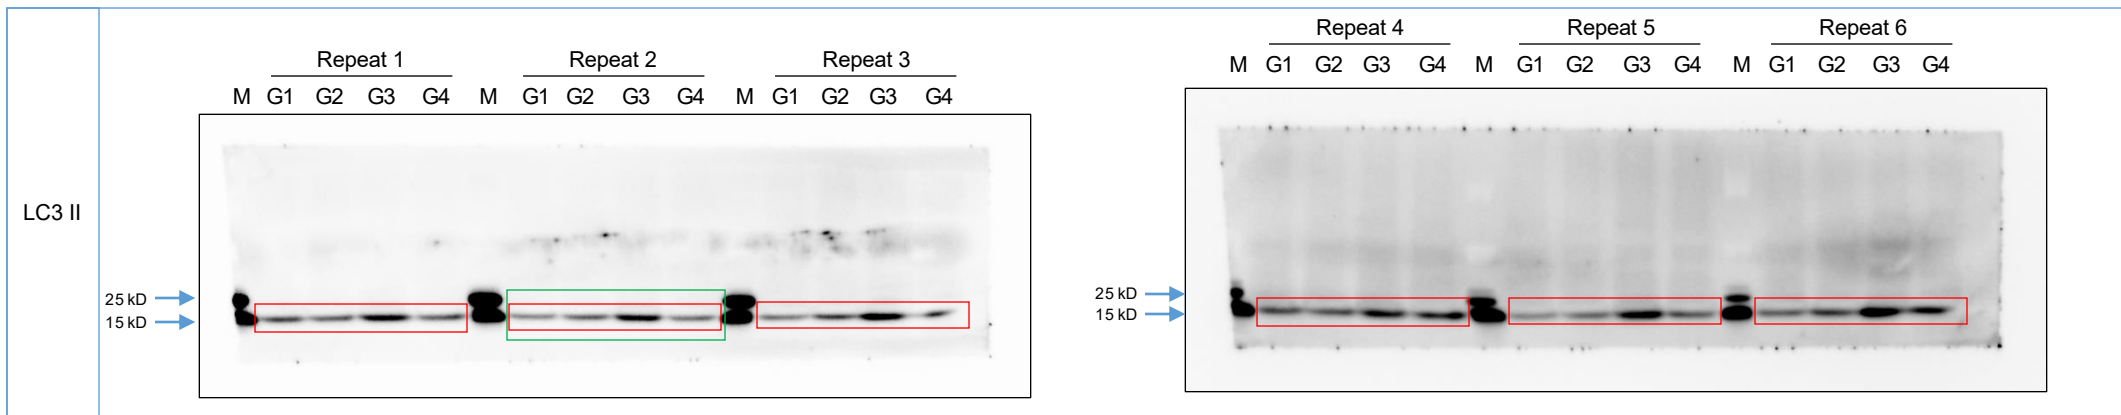

|                            | G1 | G2 | G3 | G4 |
|----------------------------|----|----|----|----|
| WT                         | ●  | ○  | ●  | ○  |
| <i>Irf7</i> <sup>-/-</sup> | ○  | ●  | ○  | ●  |
| CLP                        | ○  | ○  | ●  | ●  |

M, Marker

Target bands

Representative images presented in Figure 4A

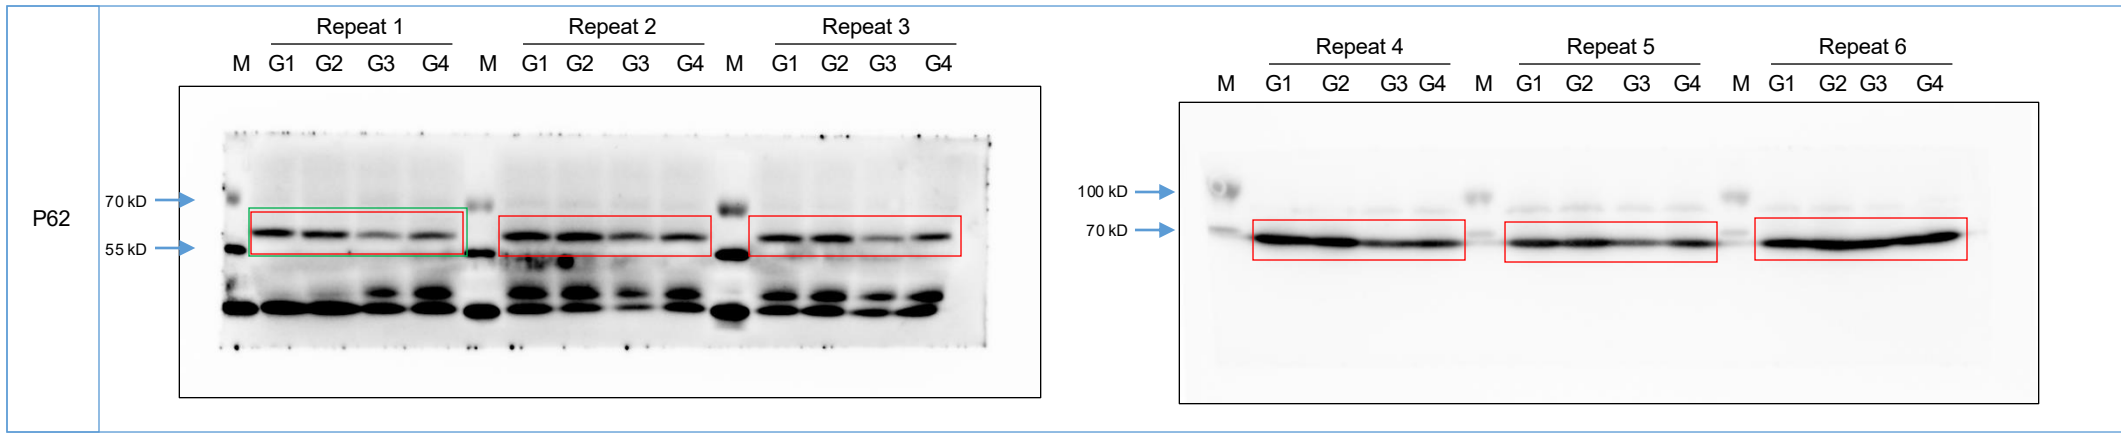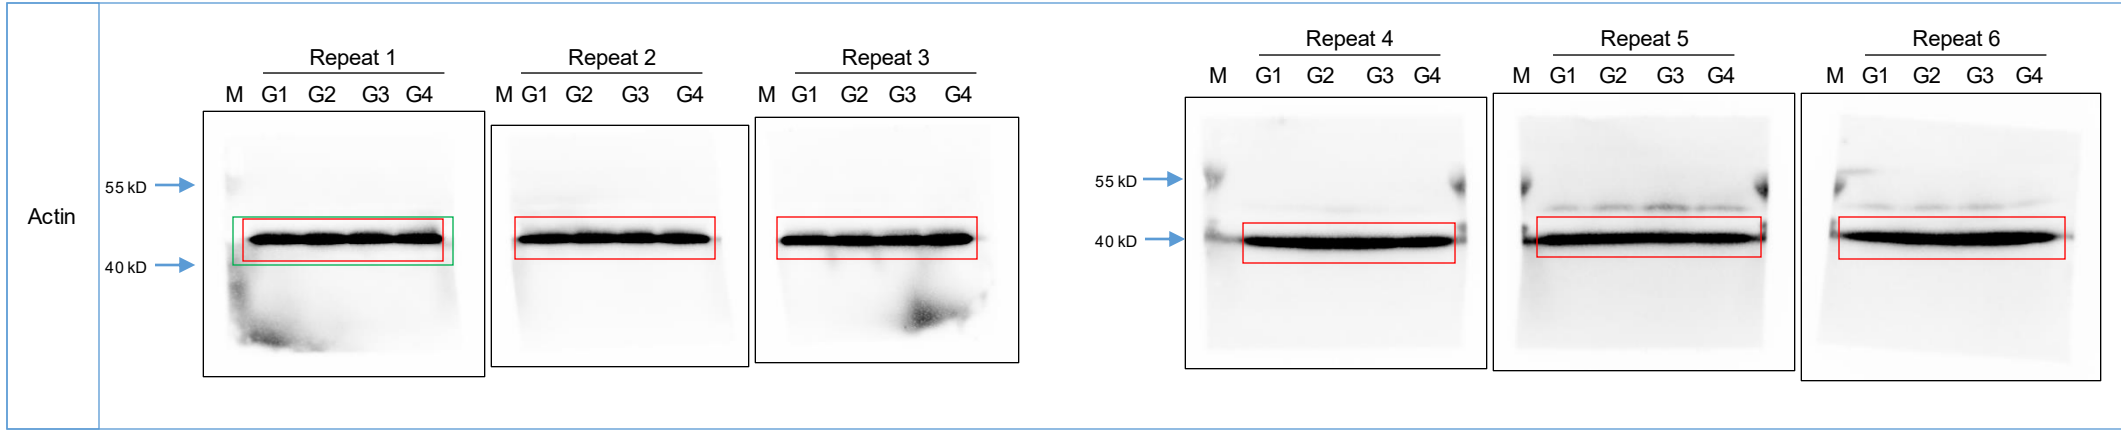

Unedited blot for Figure 4B and Supplemental Figure 5A

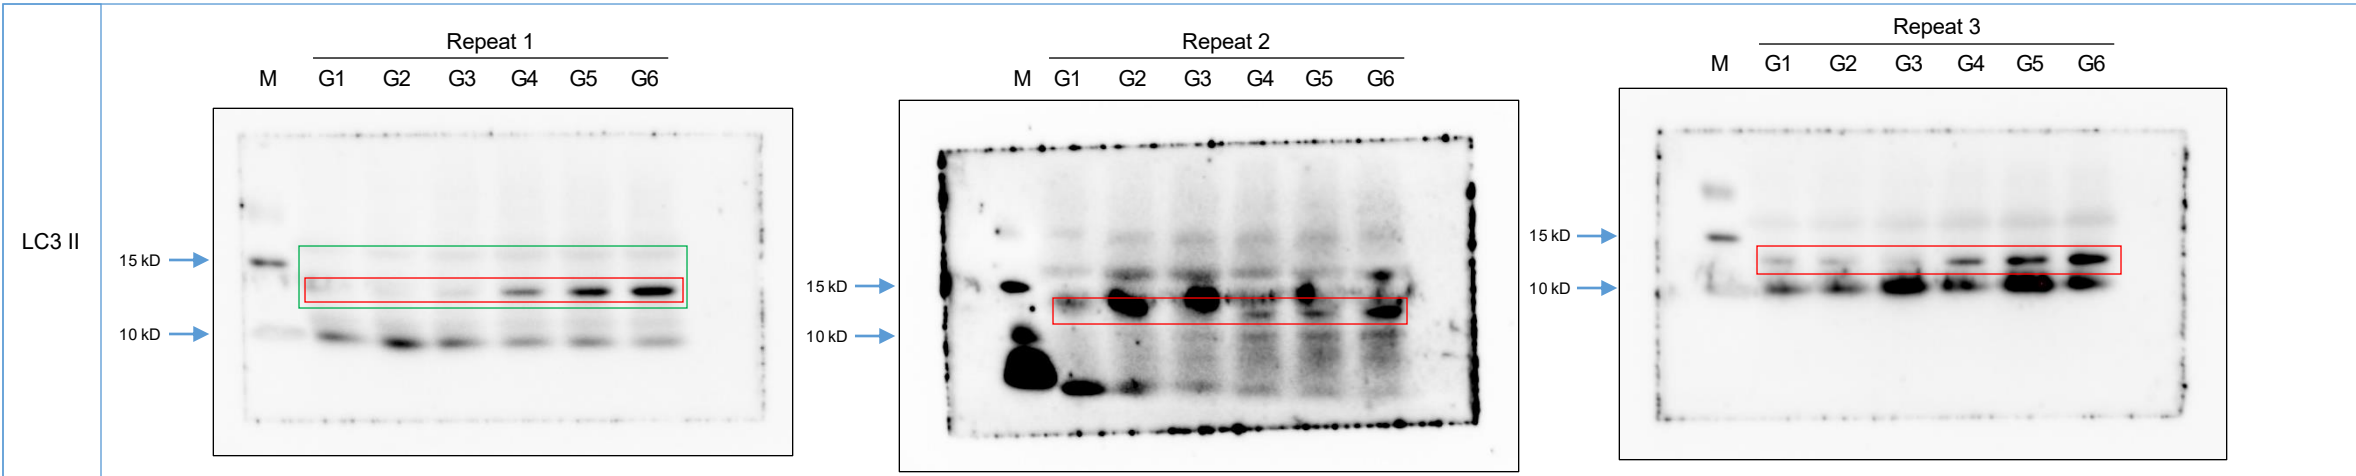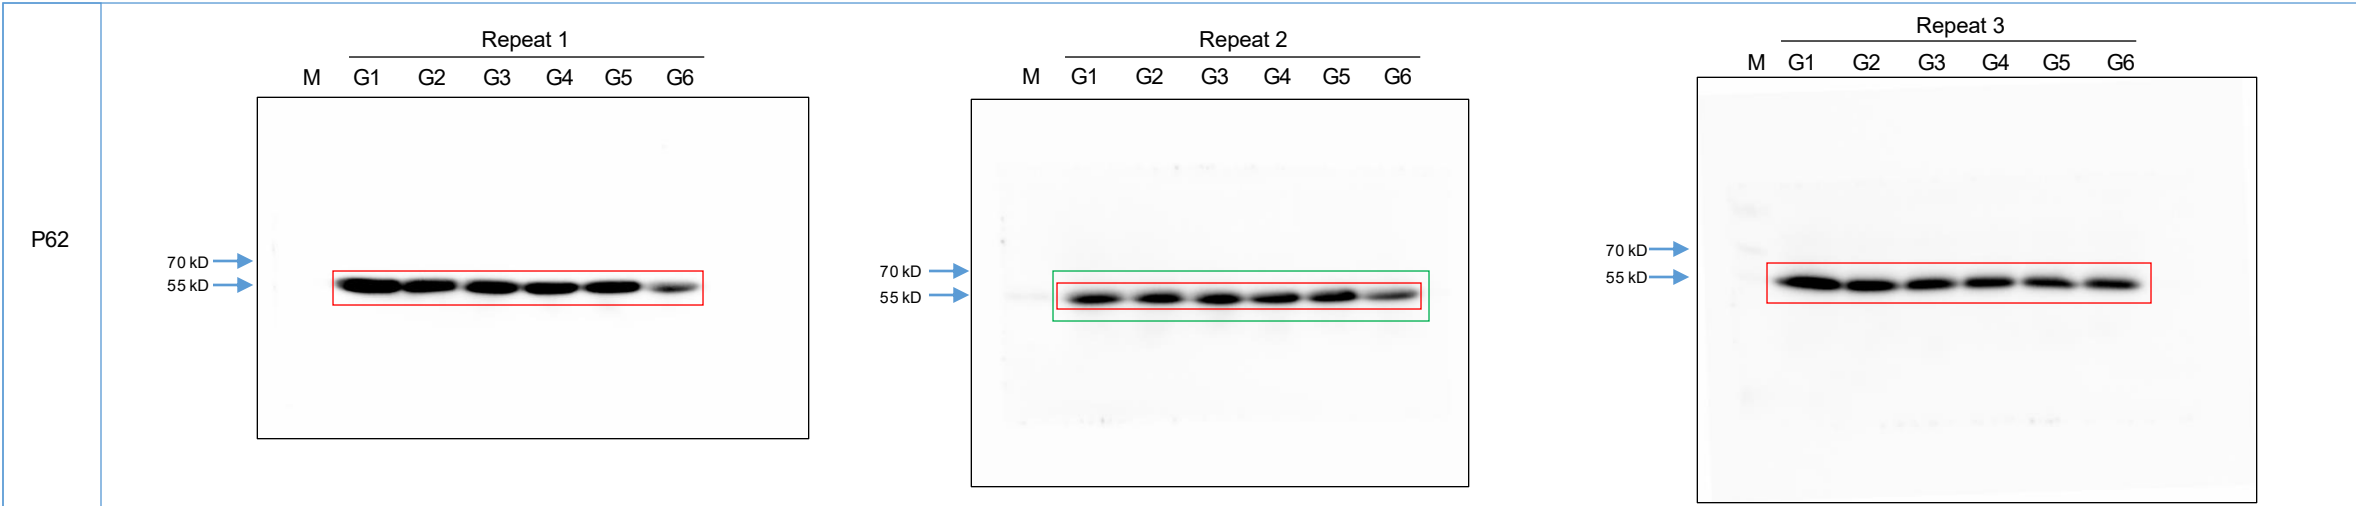

|             | G1 | G2 | G3 | G4 | G5 | G6 |
|-------------|----|----|----|----|----|----|
| Vector      | ○  | ●  | ○  | ○  | ●  | ○  |
| <i>Irf7</i> | ○  | ○  | ●  | ○  | ○  | ●  |
| LPS         | ○  | ○  | ○  | ●  | ●  | ●  |

Target bands  
 Representative images presented in Figure 4B

M, Marker

Unedited blot for Figure 4B and Supplemental Figure 5A

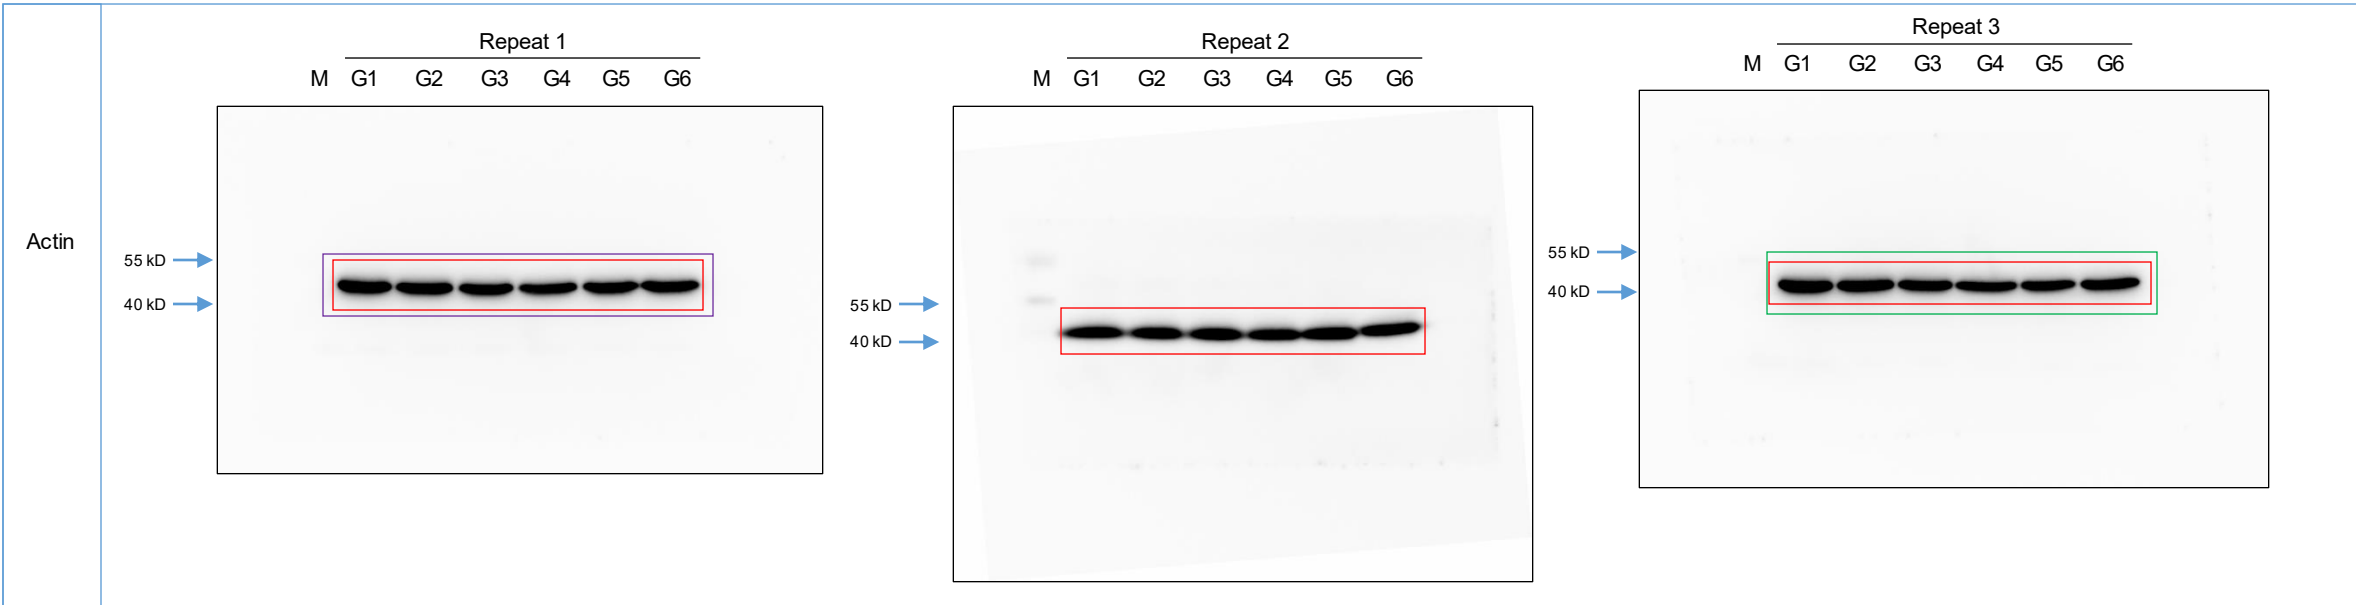

|             | G1 | G2 | G3 | G4 | G5 | G6 |
|-------------|----|----|----|----|----|----|
| Vector      | ○  | ●  | ○  | ○  | ●  | ○  |
| <i>Irf7</i> | ○  | ○  | ●  | ○  | ○  | ●  |
| LPS         | ○  | ○  | ○  | ●  | ●  | ●  |

M, Marker

Target bands

Representative images presented in Supplemental Figure 5A

Representative images presented in Figure 4B

Unedited blot for Figure 4B and Supplemental Figure 5A

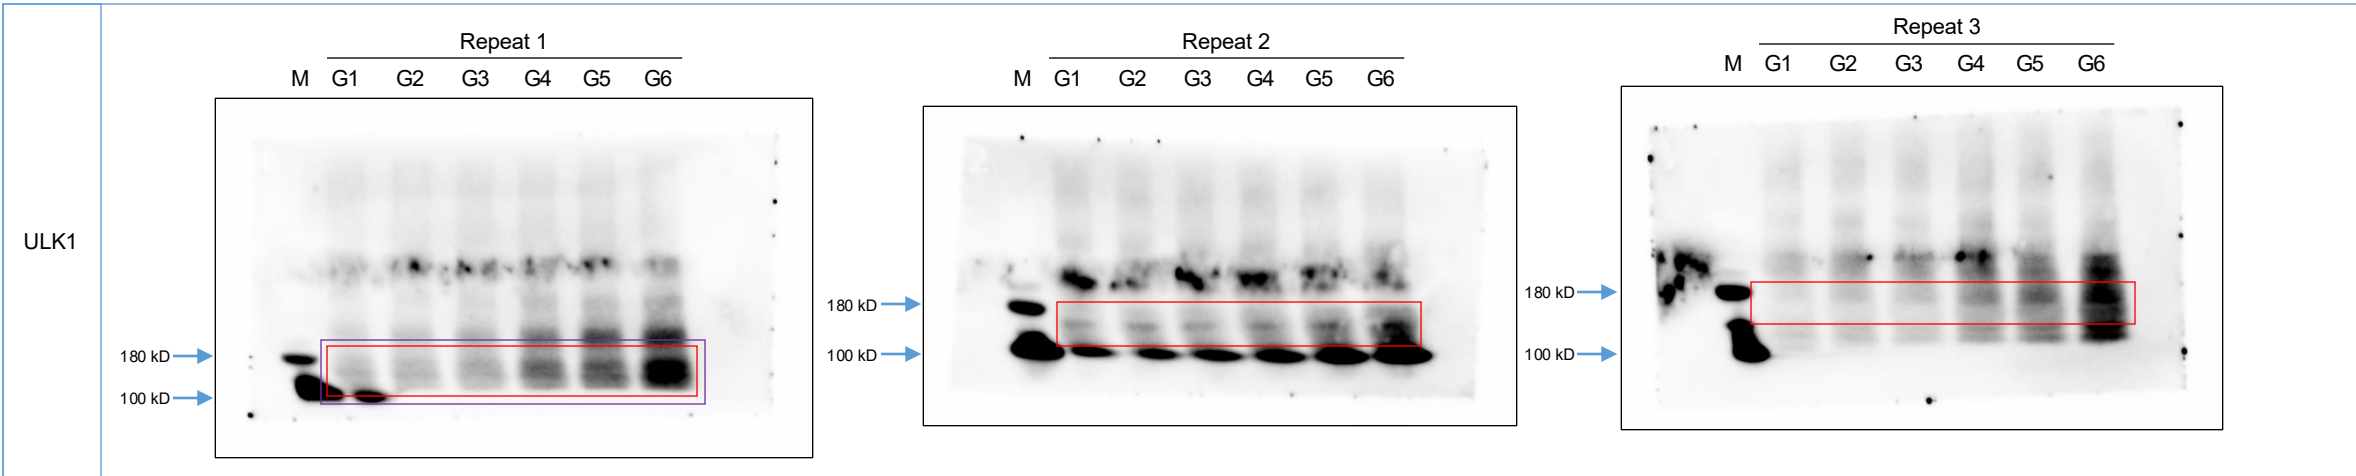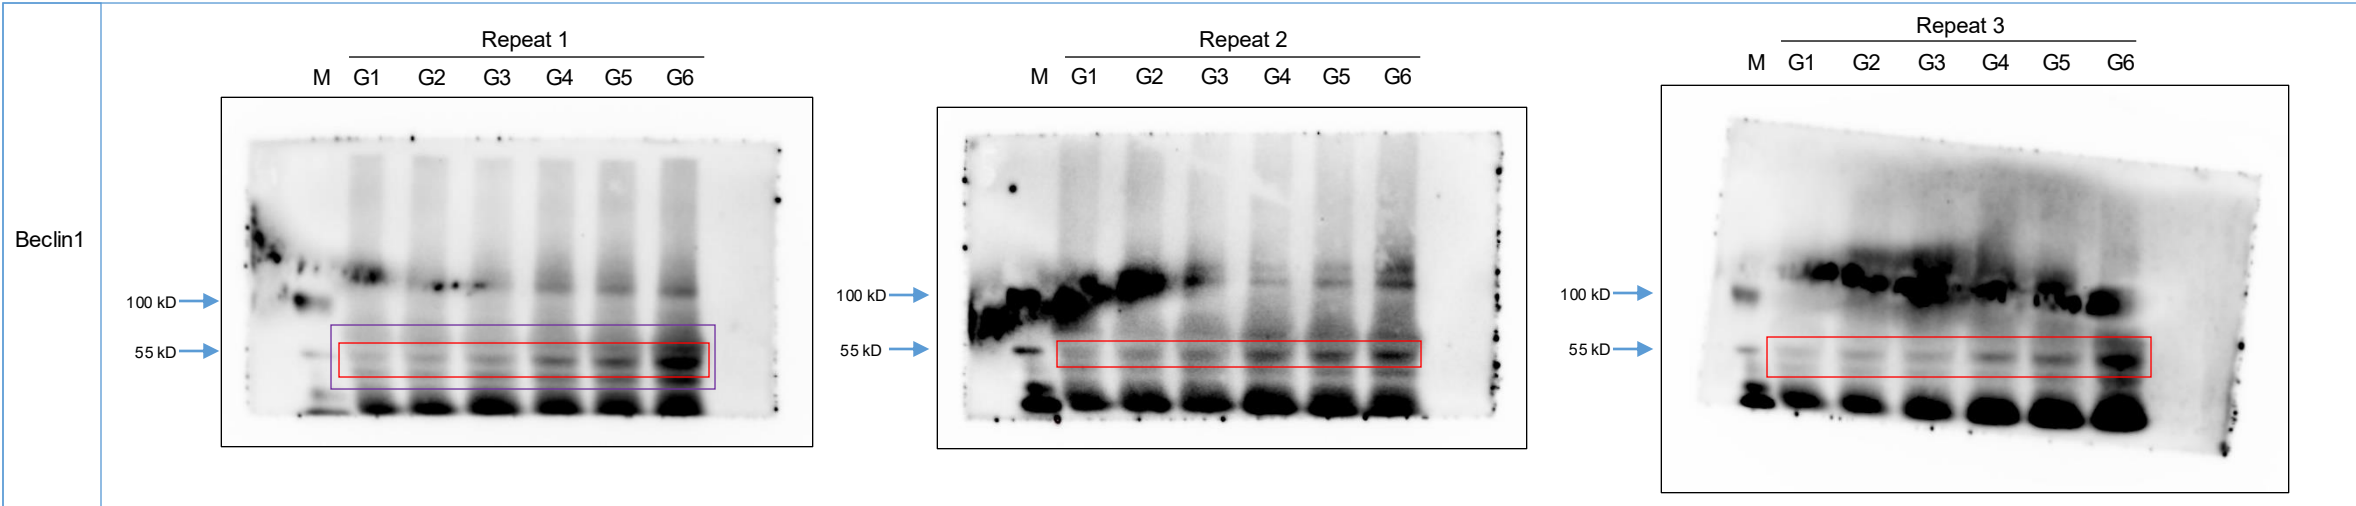

|             | G1 | G2 | G3 | G4 | G5 | G6 |
|-------------|----|----|----|----|----|----|
| Vector      | ○  | ●  | ○  | ○  | ●  | ○  |
| <i>Irf7</i> | ○  | ○  | ●  | ○  | ○  | ●  |
| LPS         | ○  | ○  | ○  | ●  | ●  | ●  |

Red box: Target bands

Purple box: Representative images presented in Supplemental Figure 5A

M, Marker

Unedited blot for Figure 4B and Supplemental Figure 5A

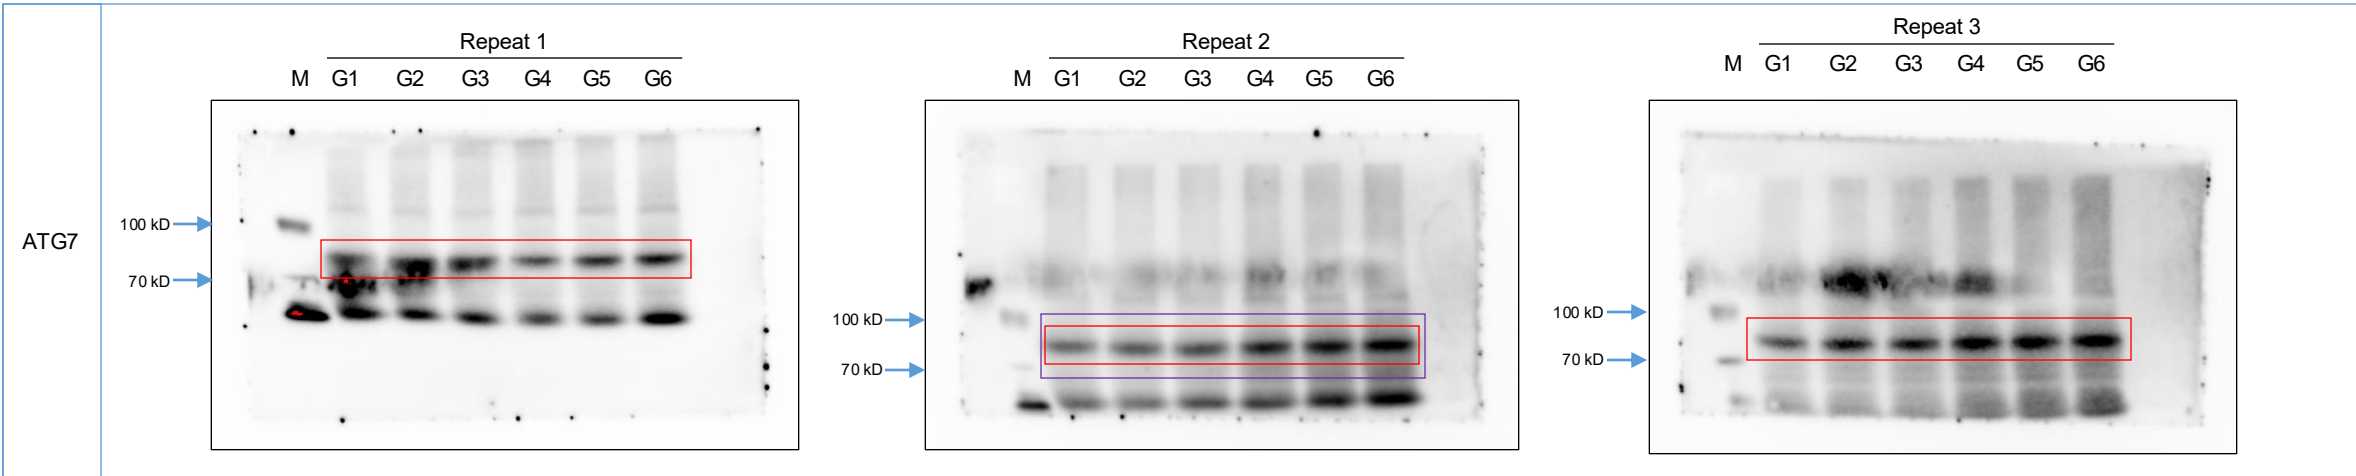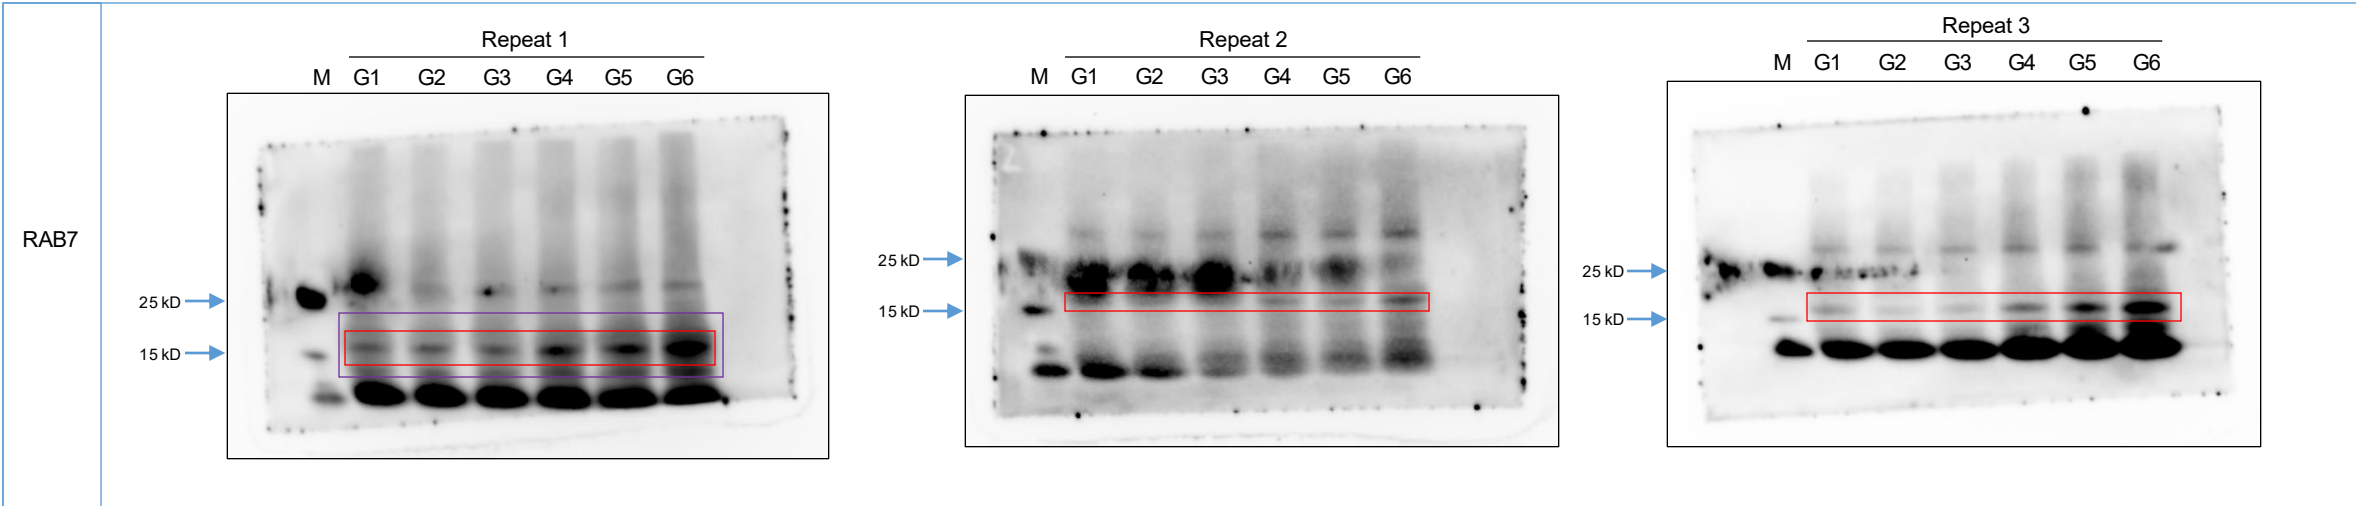

|             | G1 | G2 | G3 | G4 | G5 | G6 |
|-------------|----|----|----|----|----|----|
| Vector      | ○  | ●  | ○  | ○  | ●  | ○  |
| <i>Irf7</i> | ○  | ○  | ●  | ○  | ○  | ●  |
| LPS         | ○  | ○  | ○  | ●  | ●  | ●  |

Red box: Target bands

Purple box: Representative images presented in Supplemental Figure 5A

M, Marker

Unedited blot for Figure 4B and Supplemental Figure 5A

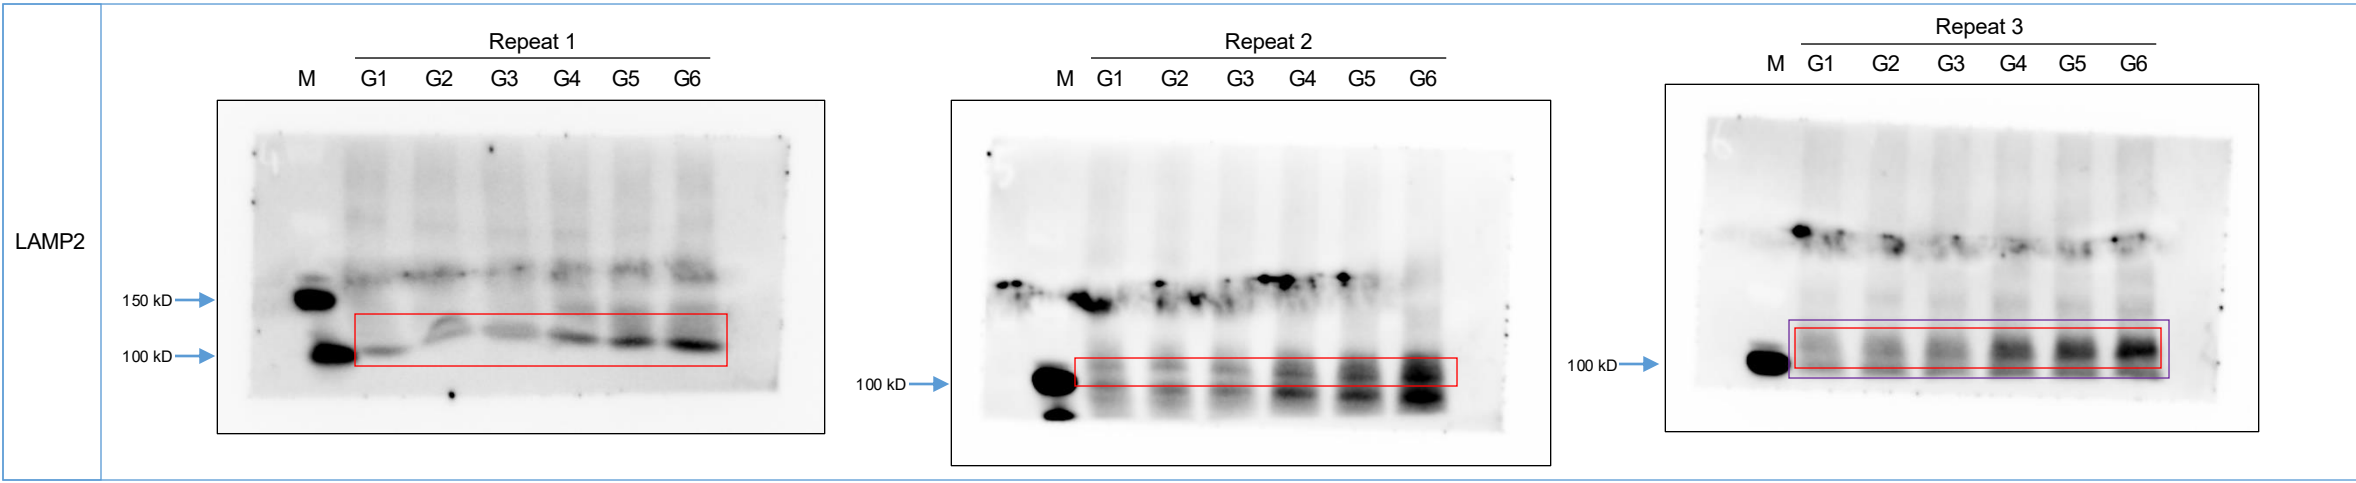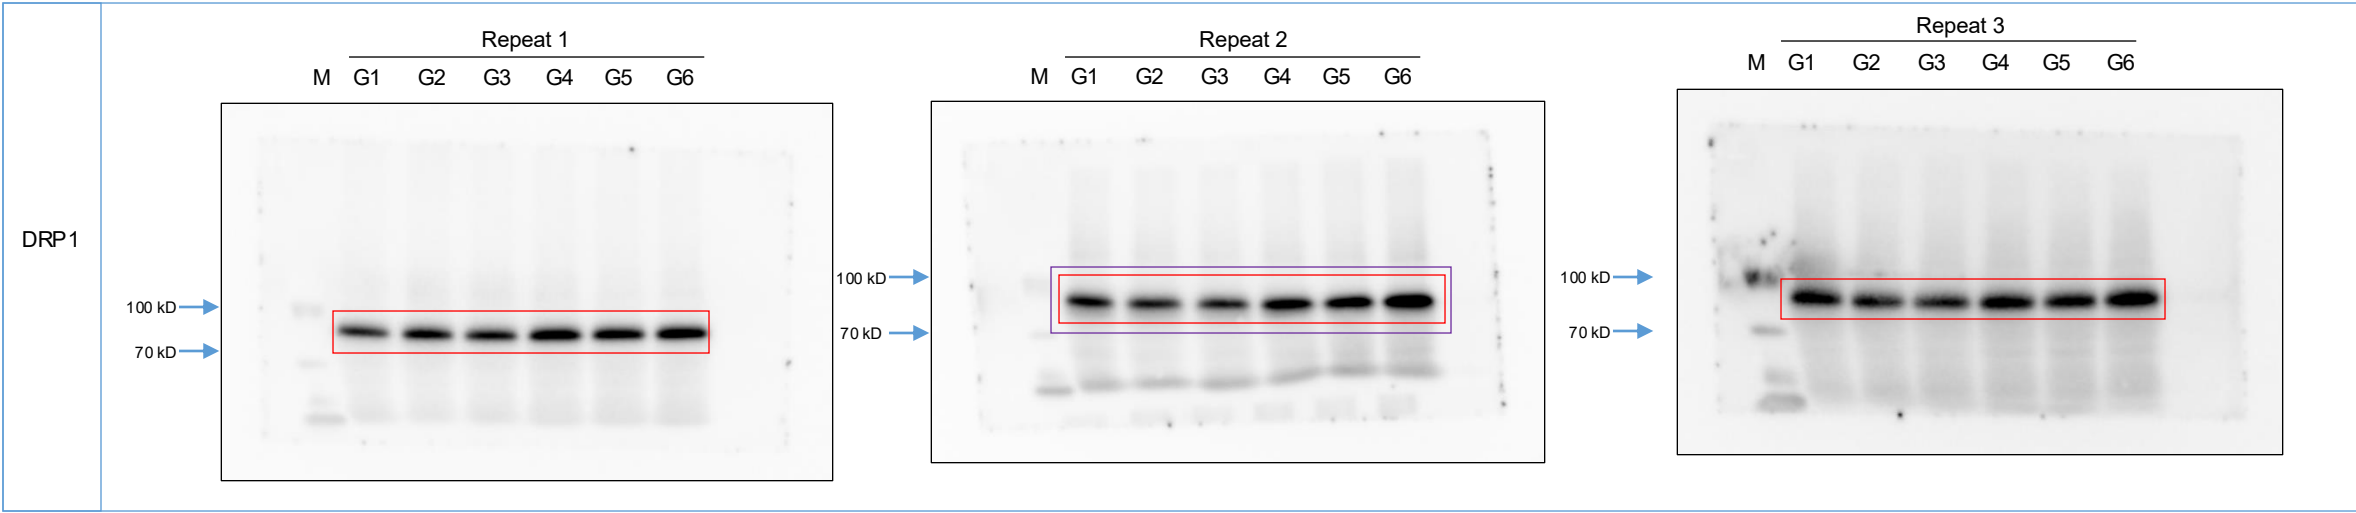

|             | G1 | G2 | G3 | G4 | G5 | G6 |
|-------------|----|----|----|----|----|----|
| Vector      | ○  | ●  | ○  | ○  | ●  | ○  |
| <i>Irf7</i> | ○  | ○  | ●  | ○  | ○  | ●  |
| LPS         | ○  | ○  | ○  | ●  | ●  | ●  |

Red box: Target bands

Purple box: Representative images presented in Supplemental Figure 5A

M, Marker

Unedited blot for Figure 4C and Supplemental Figure 5B

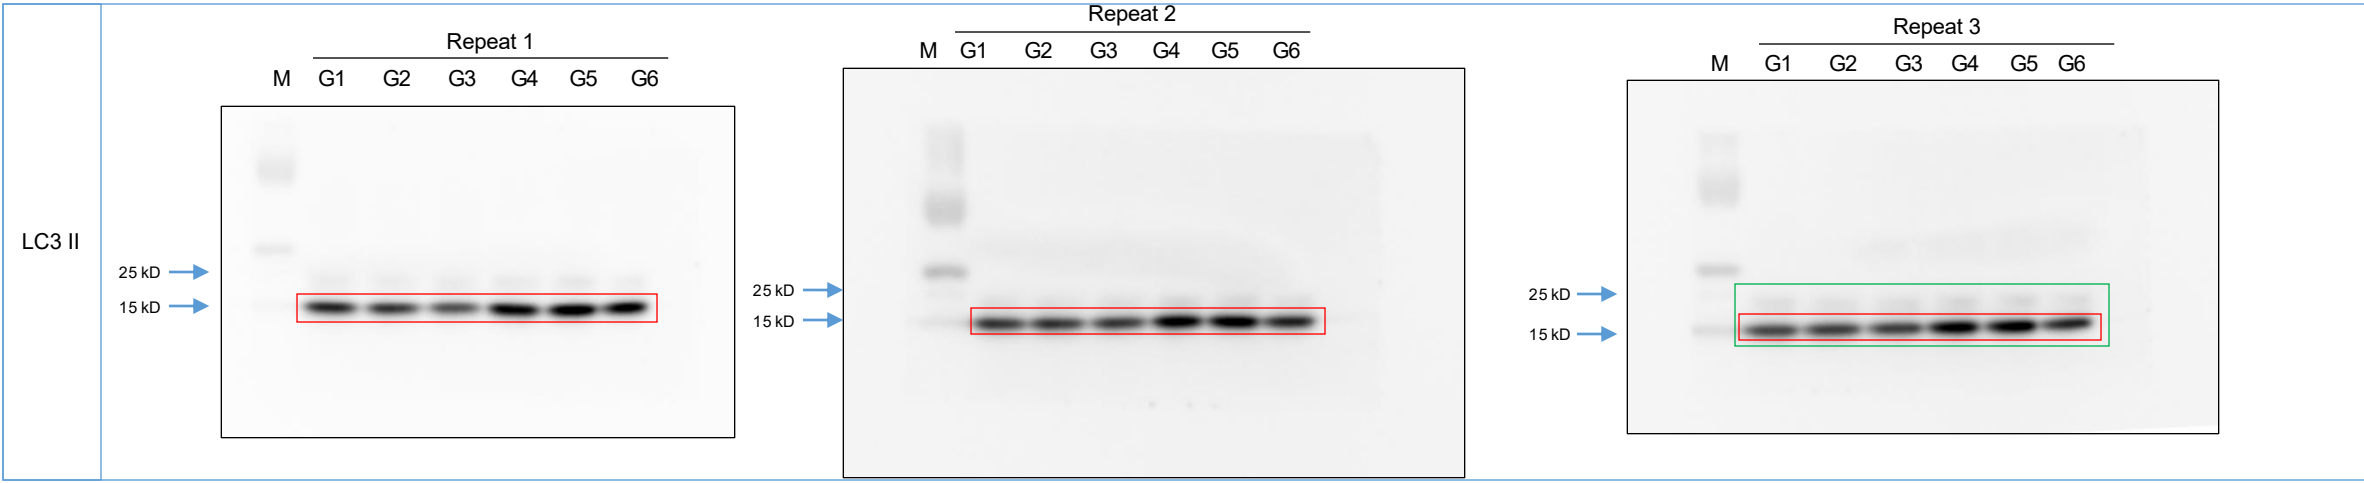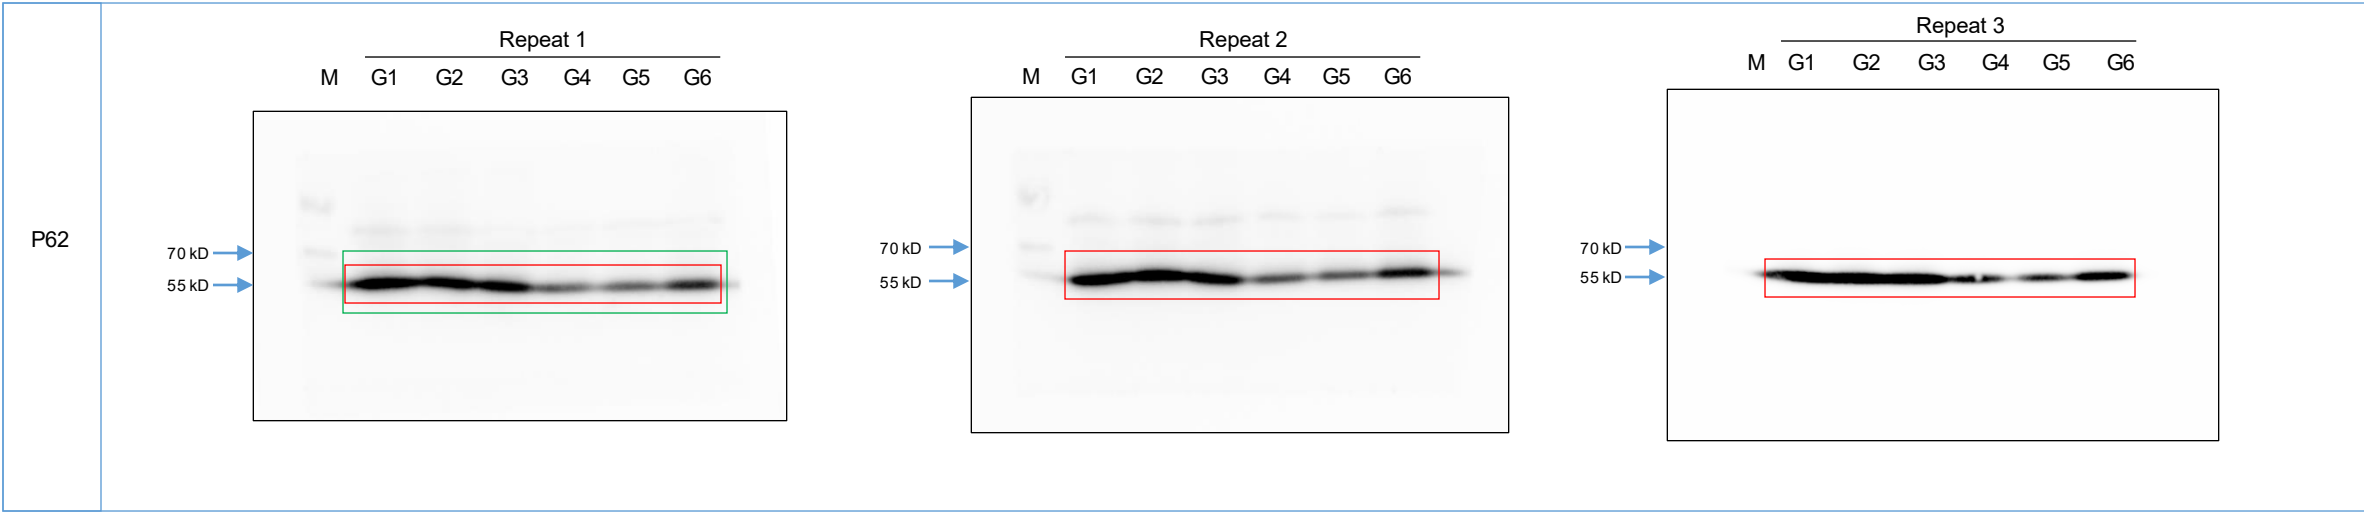

|                   | G1 | G2 | G3 | G4 | G5 | G6 |
|-------------------|----|----|----|----|----|----|
| NC siRNA          | ○  | ●  | ○  | ○  | ●  | ○  |
| <i>Irf7</i> siRNA | ○  | ○  | ●  | ○  | ○  | ●  |
| LPS               | ○  | ○  | ○  | ●  | ●  | ●  |

Target bands  
 Representative images presented in Figure 4C

M, Marker

Unedited blot for Figure 4C and Supplemental Figure 5B

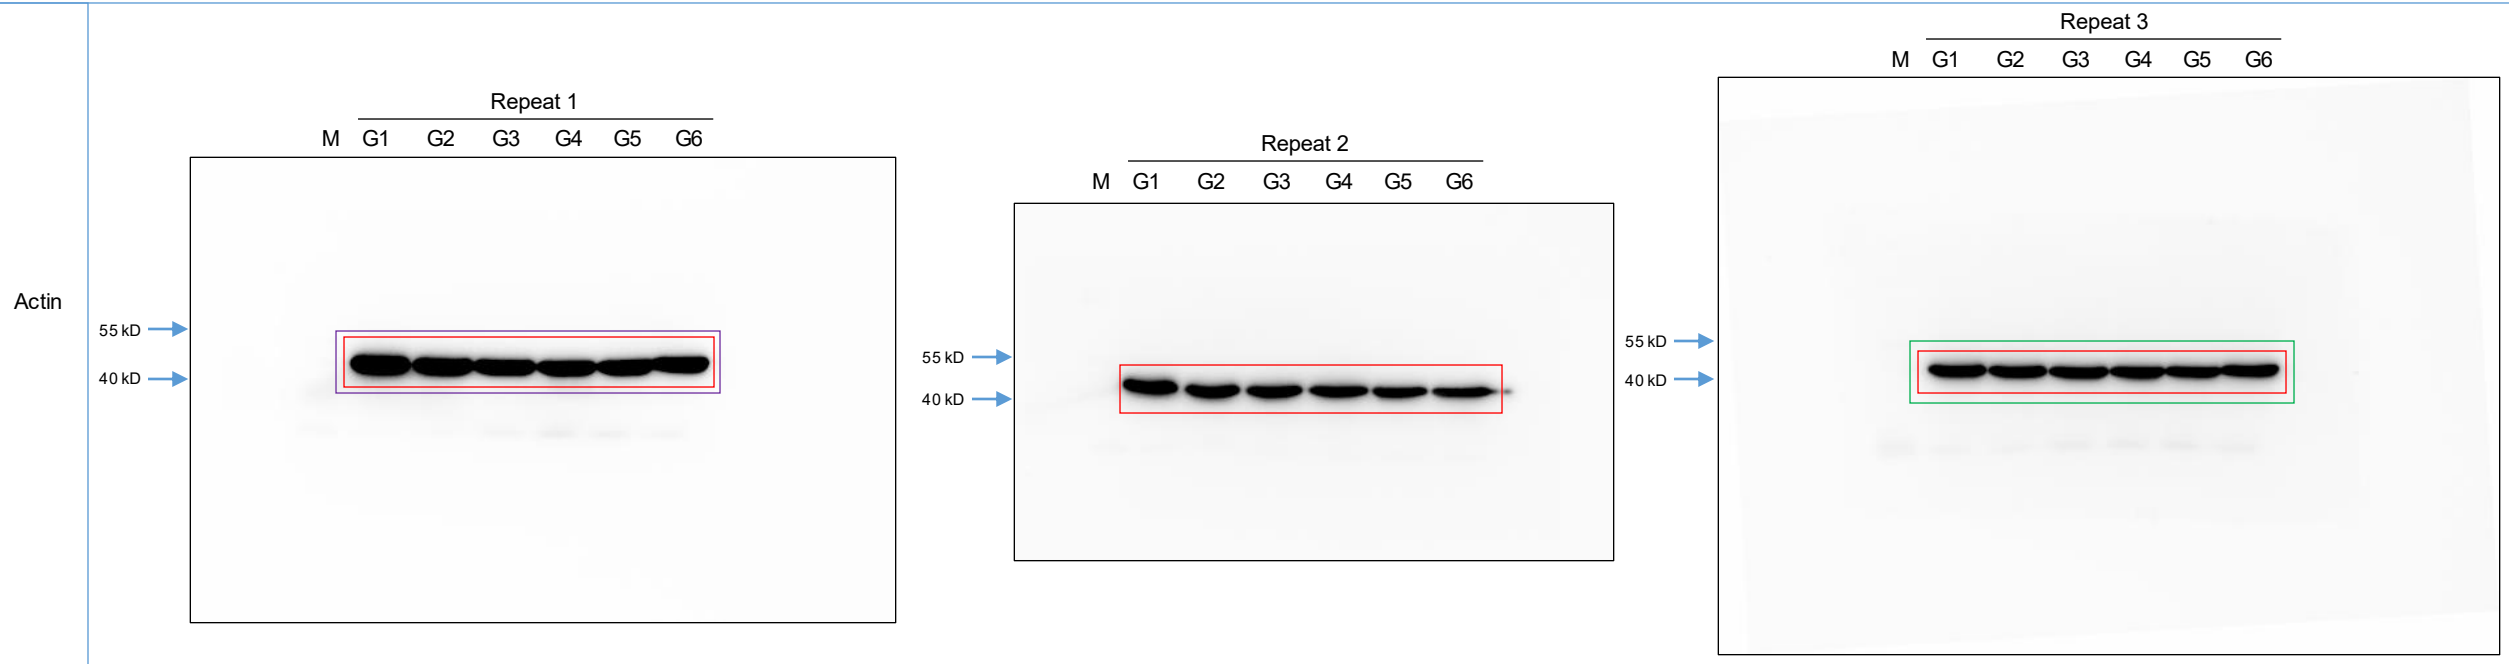

|                   | G1 | G2 | G3 | G4 | G5 | G6 |
|-------------------|----|----|----|----|----|----|
| NC siRNA          | ○  | ●  | ○  | ○  | ●  | ○  |
| <i>Irf7</i> siRNA | ○  | ○  | ●  | ○  | ○  | ●  |
| LPS               | ○  | ○  | ○  | ●  | ●  | ●  |

M, Marker

Target bands

Representative images presented in Supplemental Figure 5B

Representative images presented in Figure 4C

Unedited blot for Figure 4C and Supplemental Figure 5B

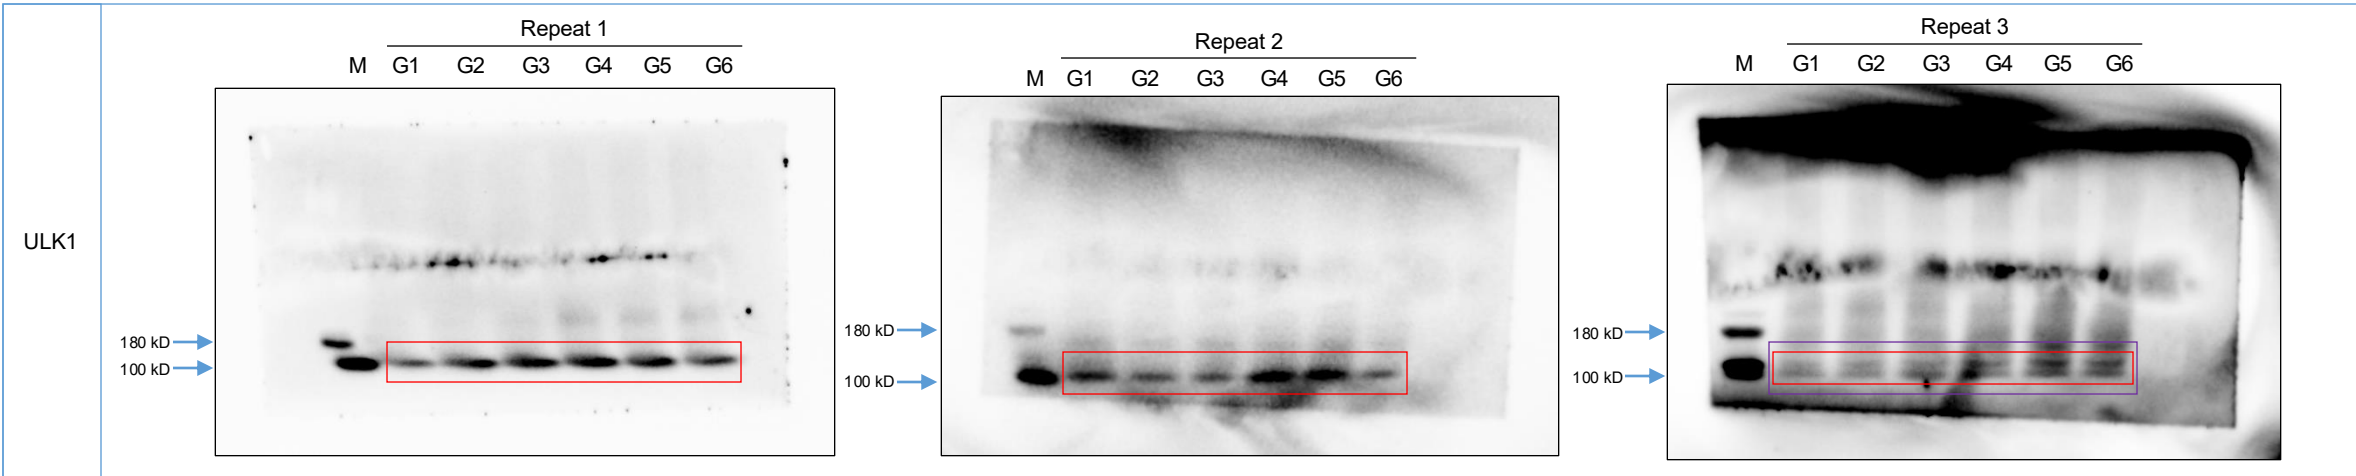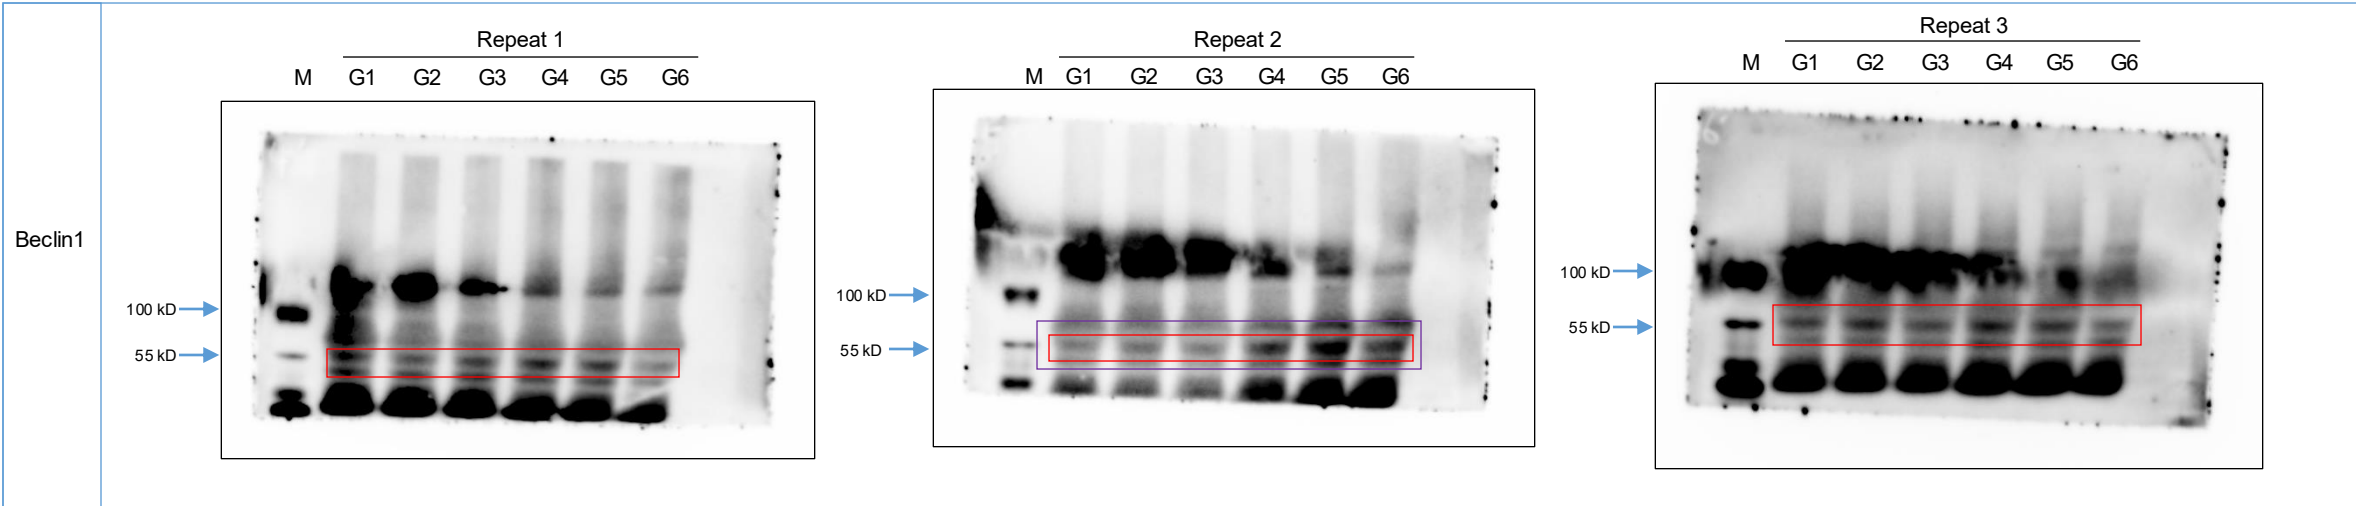

|                   | G1 | G2 | G3 | G4 | G5 | G6 |
|-------------------|----|----|----|----|----|----|
| NC siRNA          | ○  | ●  | ○  | ○  | ●  | ○  |
| <i>Irf7</i> siRNA | ○  | ○  | ●  | ○  | ○  | ●  |
| LPS               | ○  | ○  | ○  | ●  | ●  | ●  |

Red box: Target bands

Purple box: Representative images presented in Supplemental Figure 5B

M, Marker

Unedited blot for Figure 4C and Supplemental Figure 5B

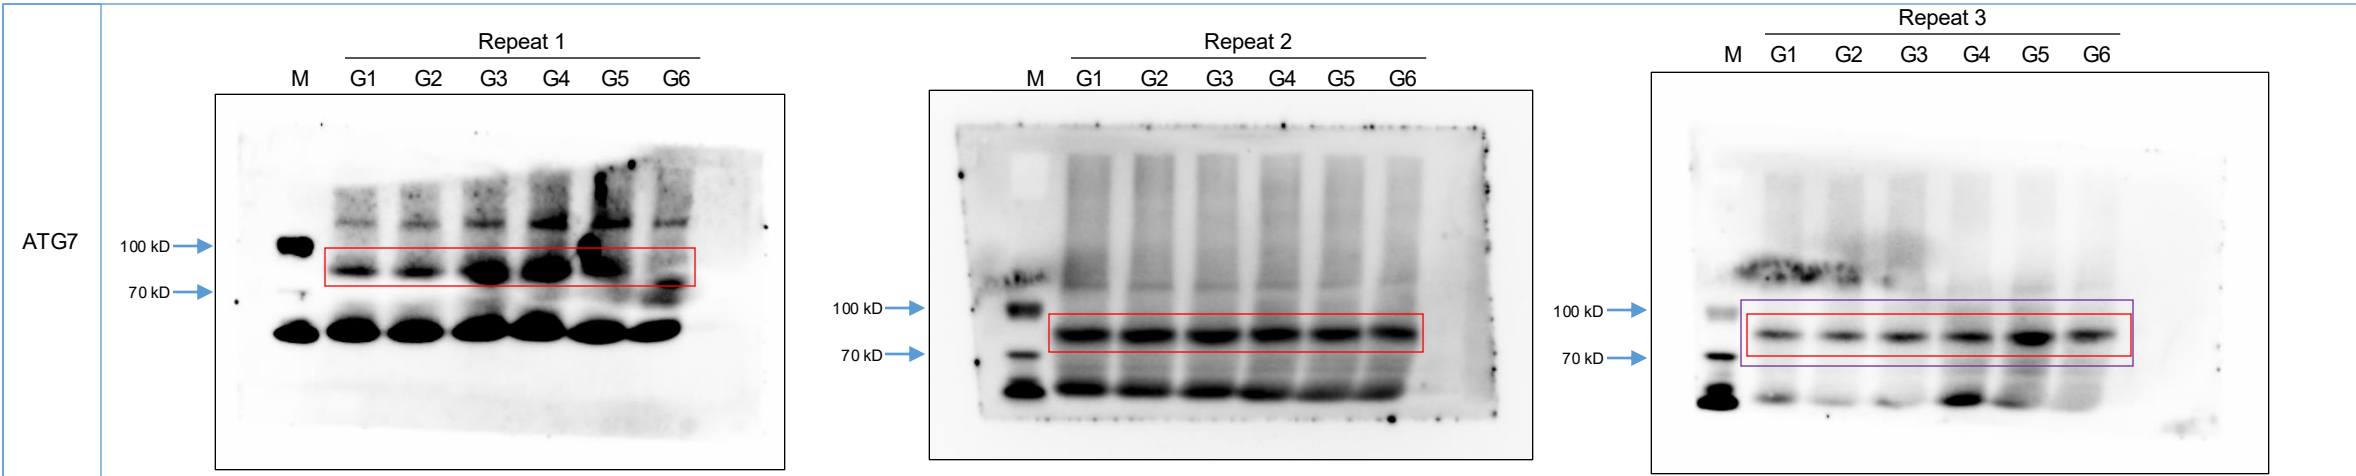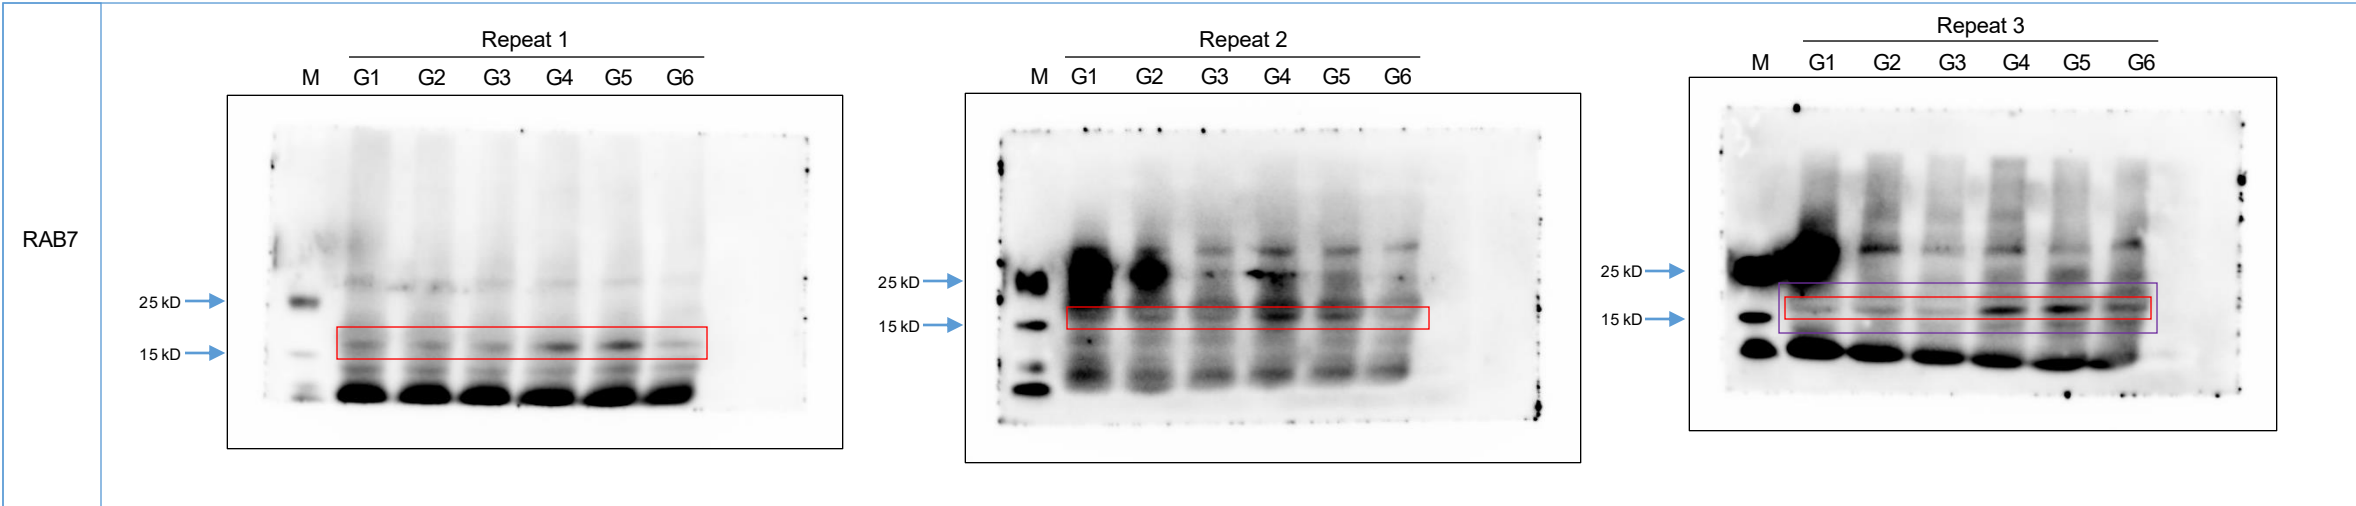

|                   | G1 | G2 | G3 | G4 | G5 | G6 |
|-------------------|----|----|----|----|----|----|
| NC siRNA          | ○  | ●  | ○  | ○  | ●  | ○  |
| <i>Irf7</i> siRNA | ○  | ○  | ●  | ○  | ○  | ●  |
| LPS               | ○  | ○  | ○  | ●  | ●  | ●  |

Target bands

Representative images presented in Supplemental Figure 5B

M, Marker

Unedited blot for Figure 4C and Supplemental Figure 5B

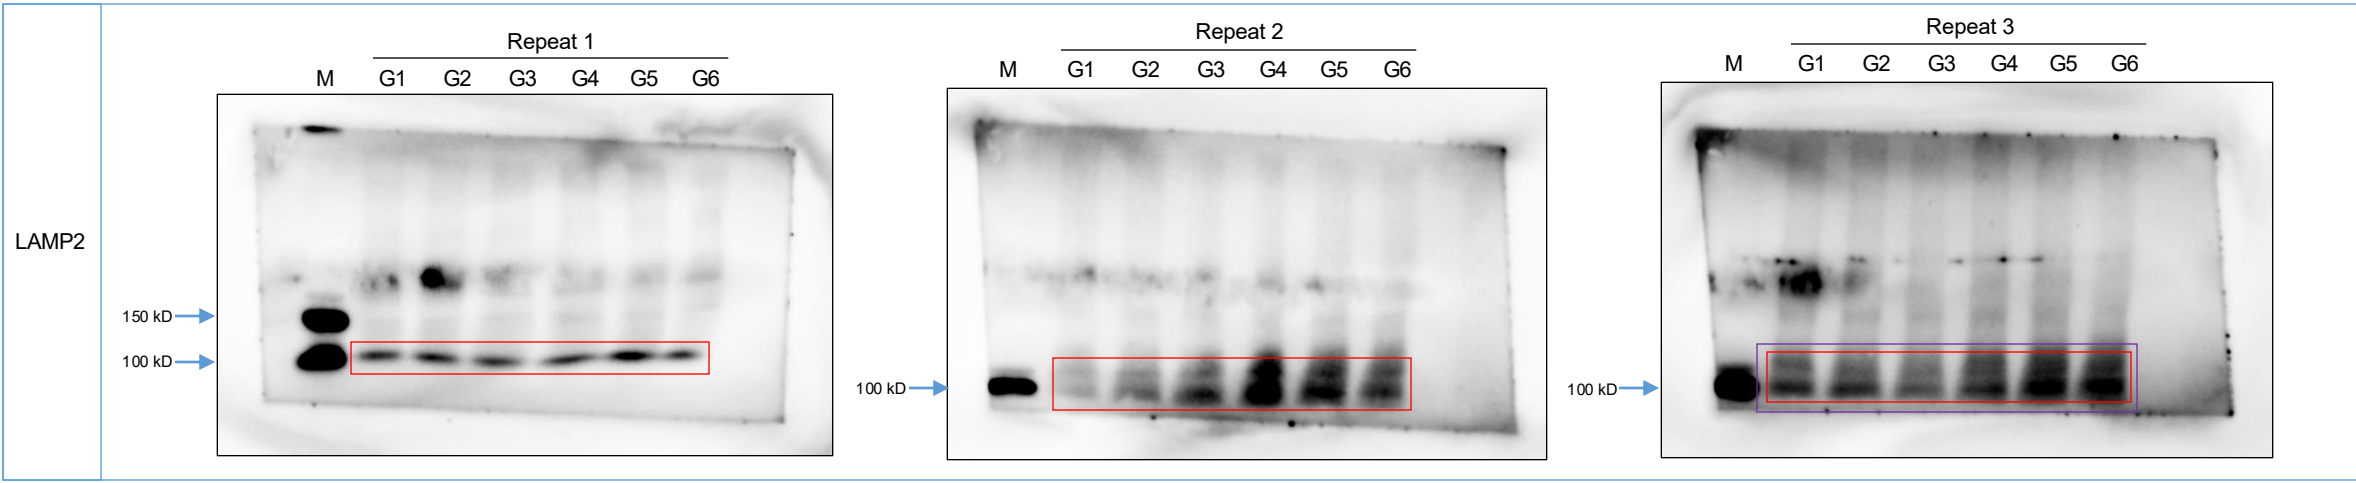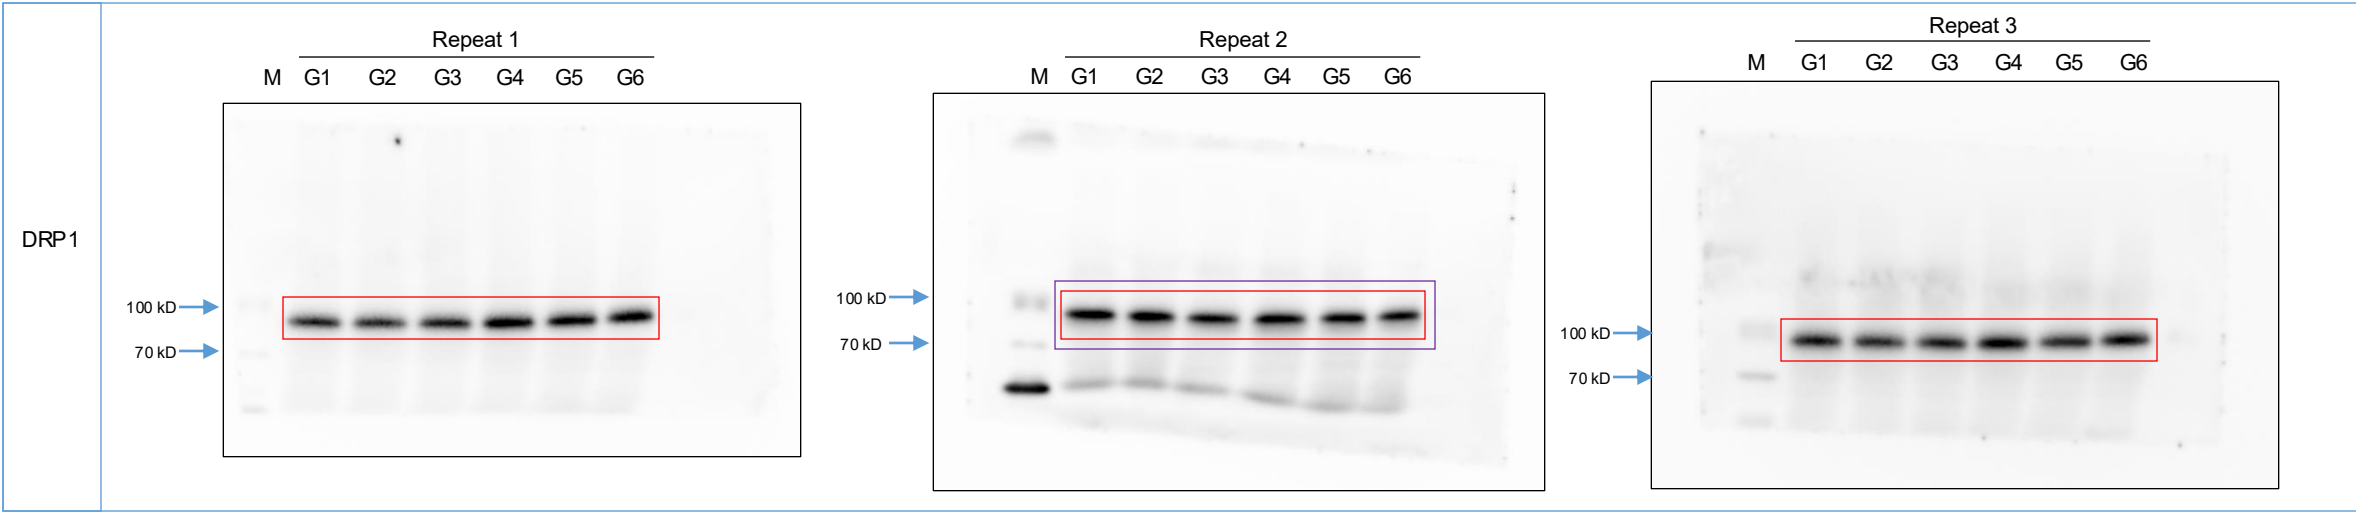

|                   | G1 | G2 | G3 | G4 | G5 | G6 |
|-------------------|----|----|----|----|----|----|
| NC siRNA          | ○  | ●  | ○  | ○  | ●  | ○  |
| <i>Irf7</i> siRNA | ○  | ○  | ●  | ○  | ○  | ●  |
| LPS               | ○  | ○  | ○  | ●  | ●  | ●  |

Red box: Target bands

Purple box: Representative images presented in Supplemental Figure 5B

M, Marker

# Unedited blot for Supplemental Figure 1

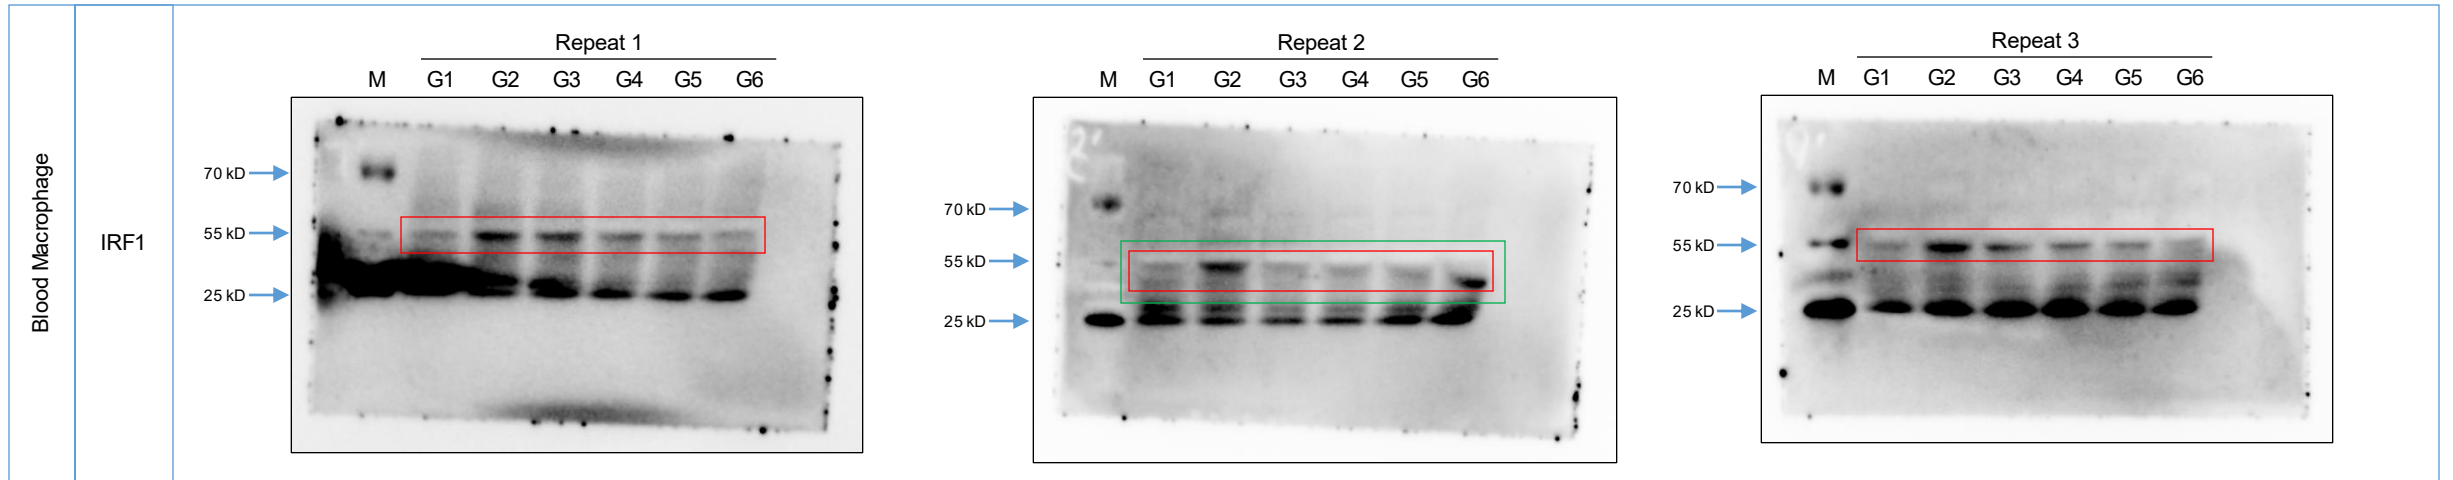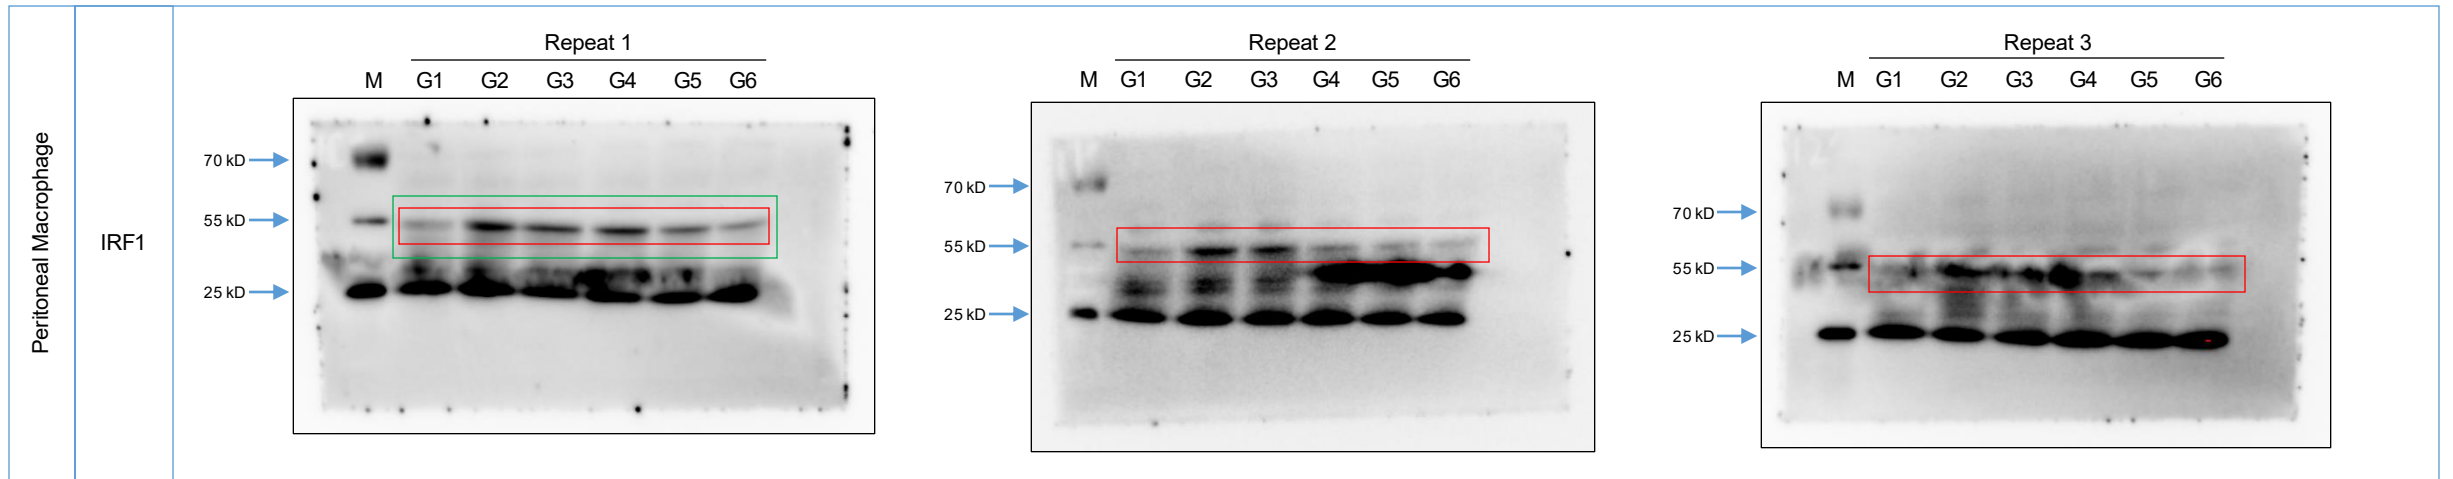

|         |    |    |    |    |    |    |
|---------|----|----|----|----|----|----|
|         | G1 | G2 | G3 | G4 | G5 | G6 |
| CLP (h) | 0  | 2  | 4  | 8  | 16 | 24 |

M, Marker

Target bands

Representative images presented in Supplemental Figure 1A

# Unedited blot for Supplemental Figure 1

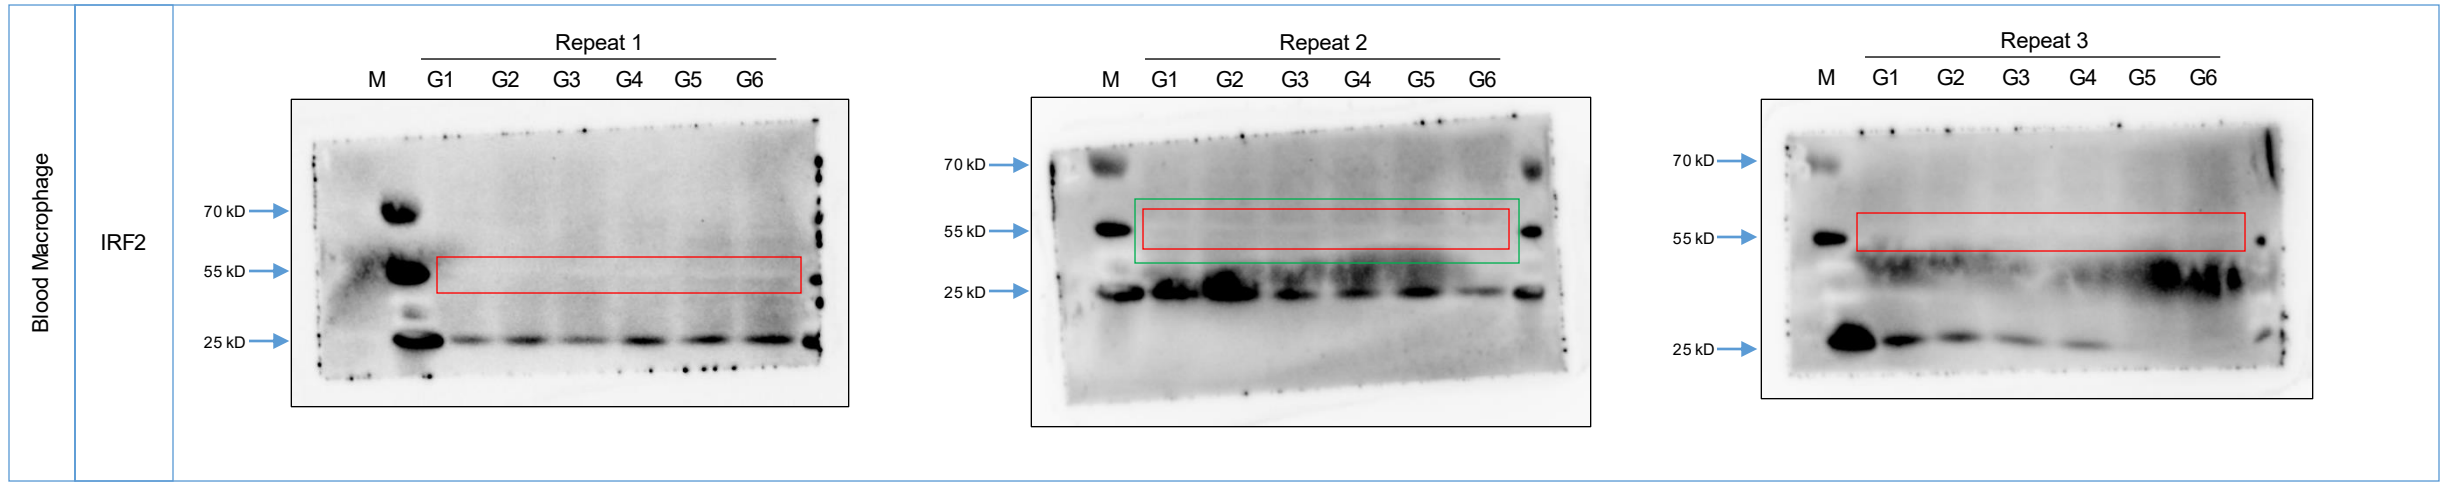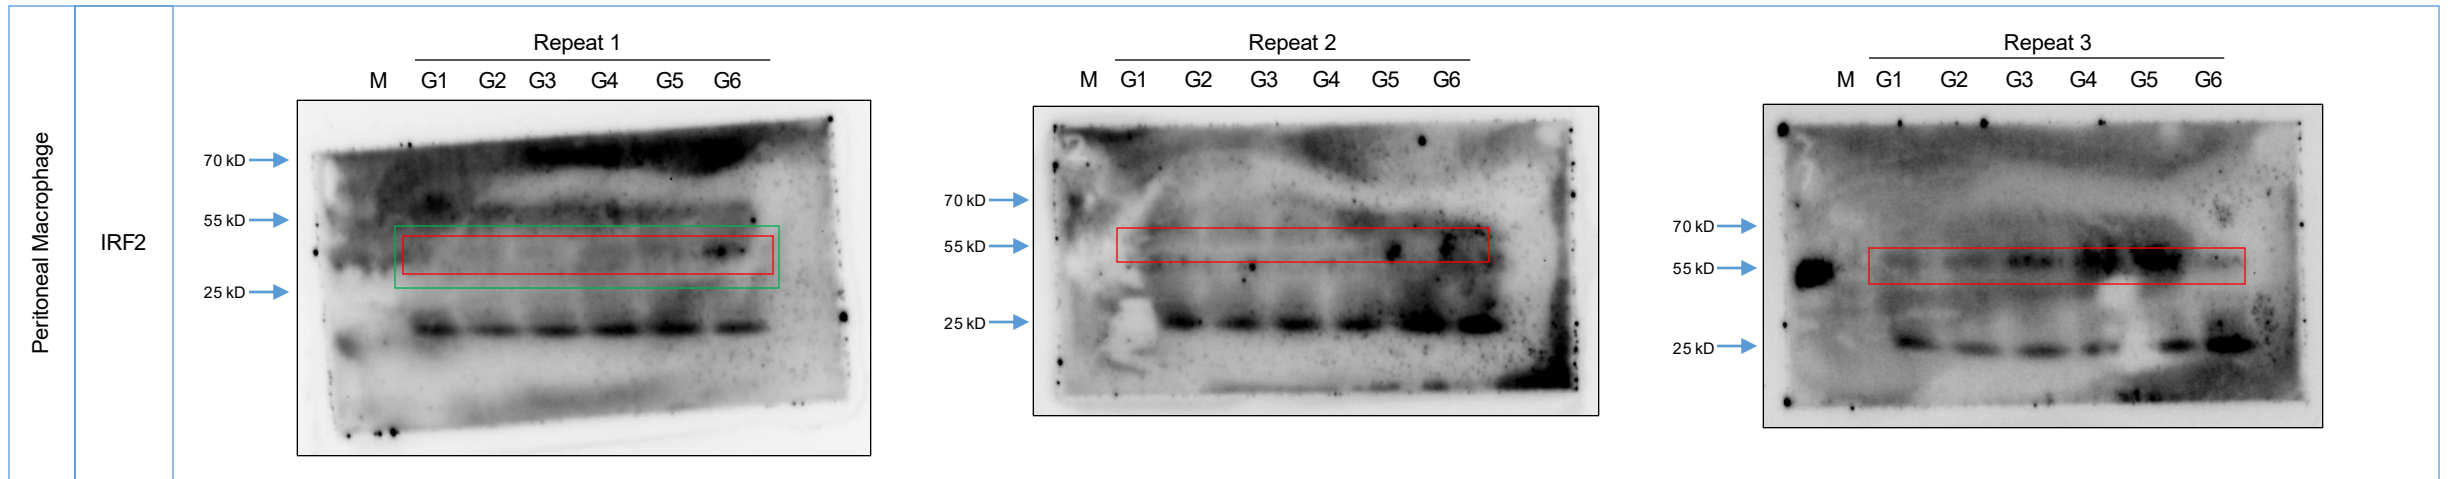

|         |    |    |    |    |    |    |
|---------|----|----|----|----|----|----|
|         | G1 | G2 | G3 | G4 | G5 | G6 |
| CLP (h) | 0  | 2  | 4  | 8  | 16 | 24 |

M, Marker

 Target bands

 Representative images presented in Supplemental Figure 1A

# Unedited blot for Supplemental Figure 1

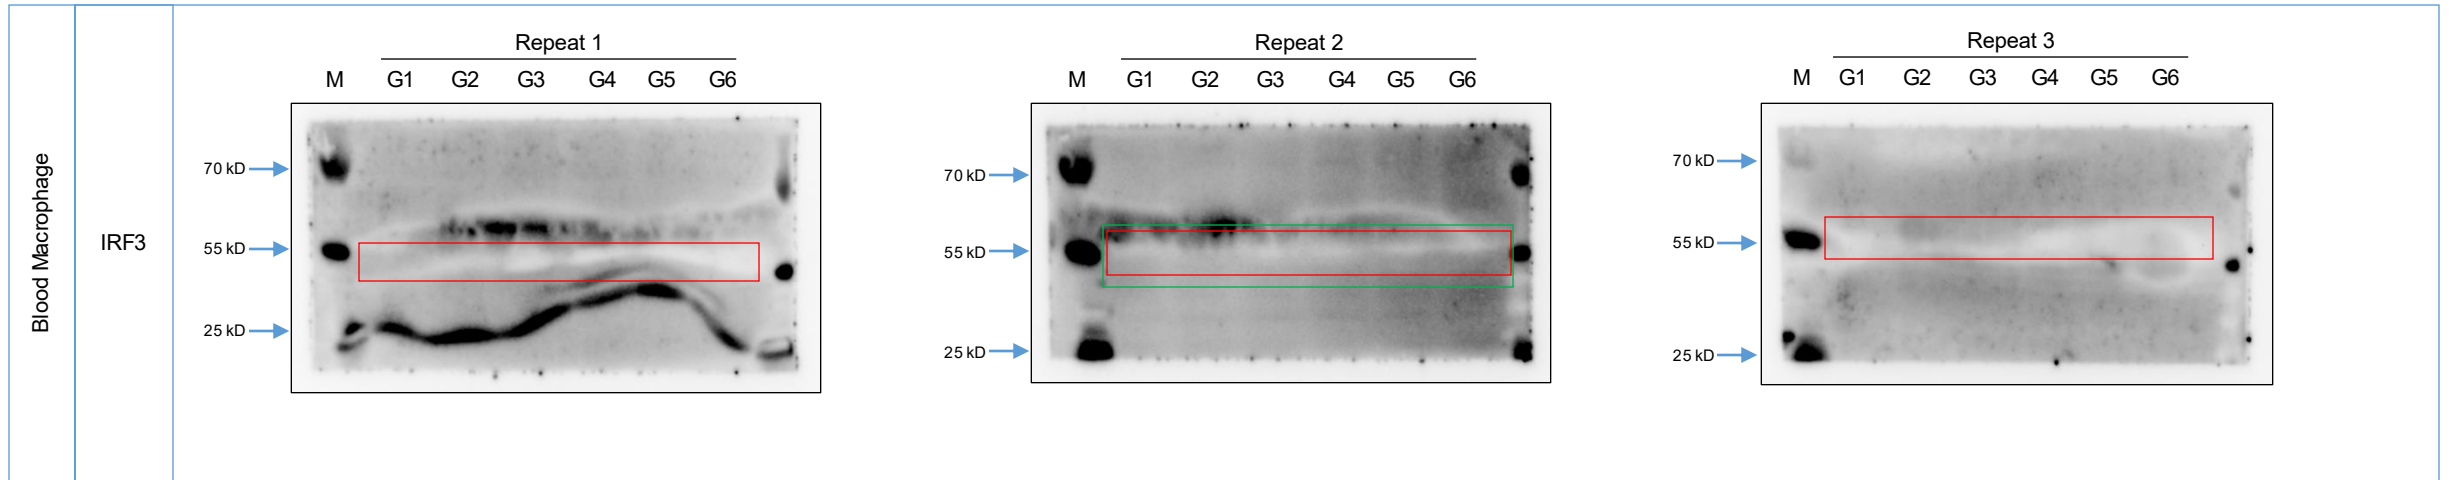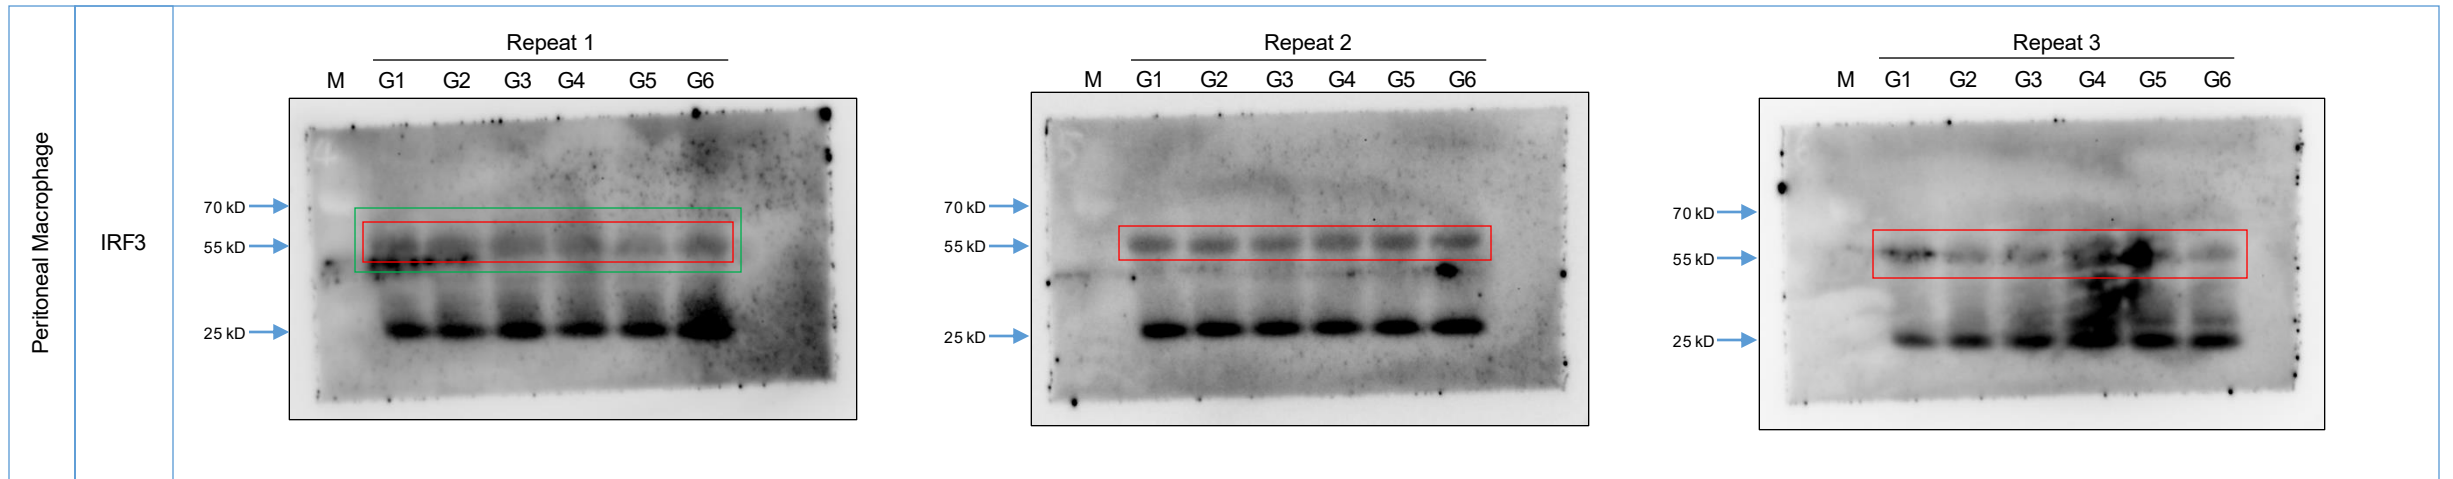

|         |    |    |    |    |    |    |
|---------|----|----|----|----|----|----|
|         | G1 | G2 | G3 | G4 | G5 | G6 |
| CLP (h) | 0  | 2  | 4  | 8  | 16 | 24 |

M, Marker

Target bands

Representative images presented in Supplemental Figure 1A

# Unedited blot for Supplemental Figure 1

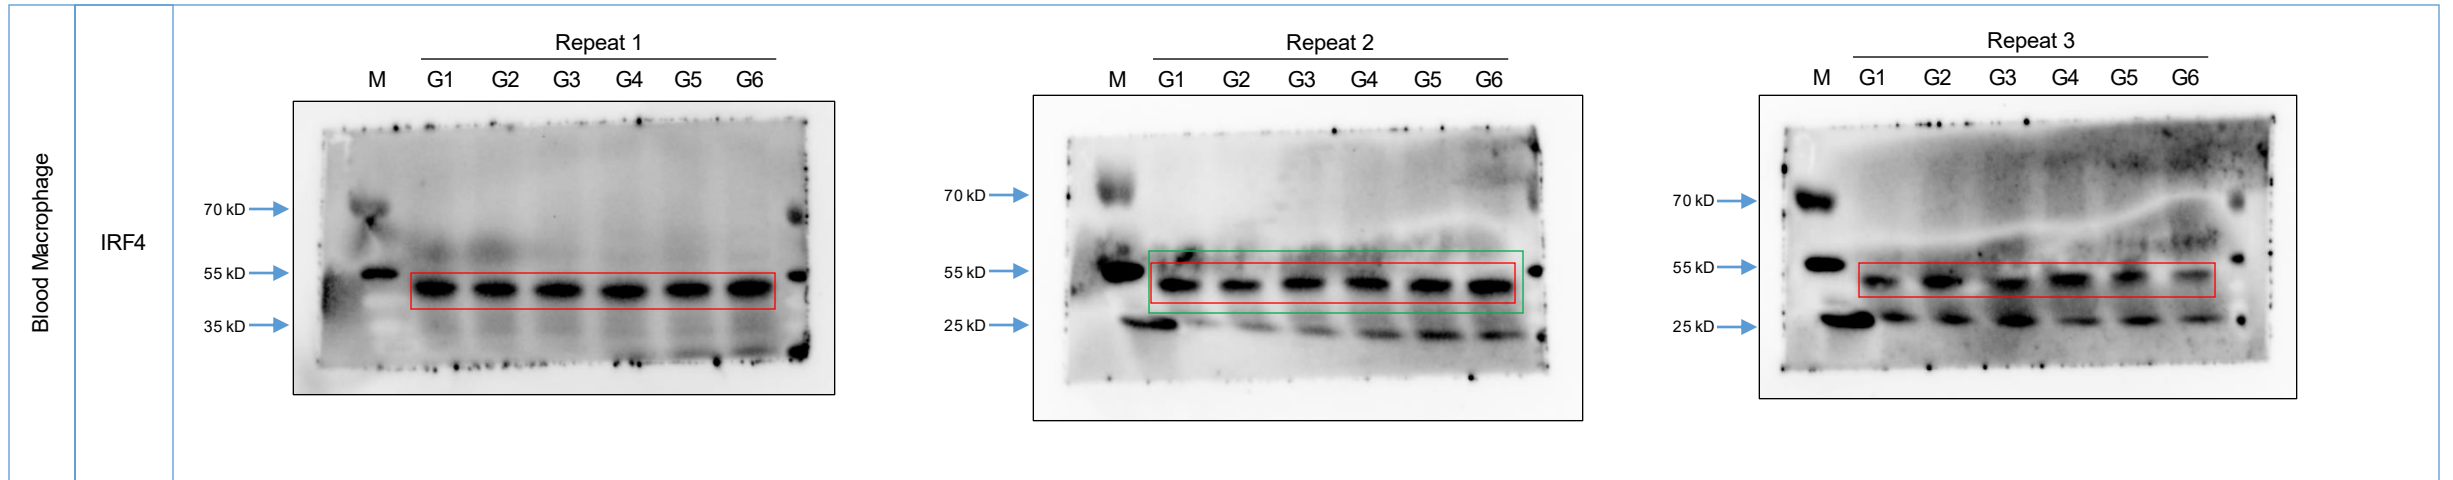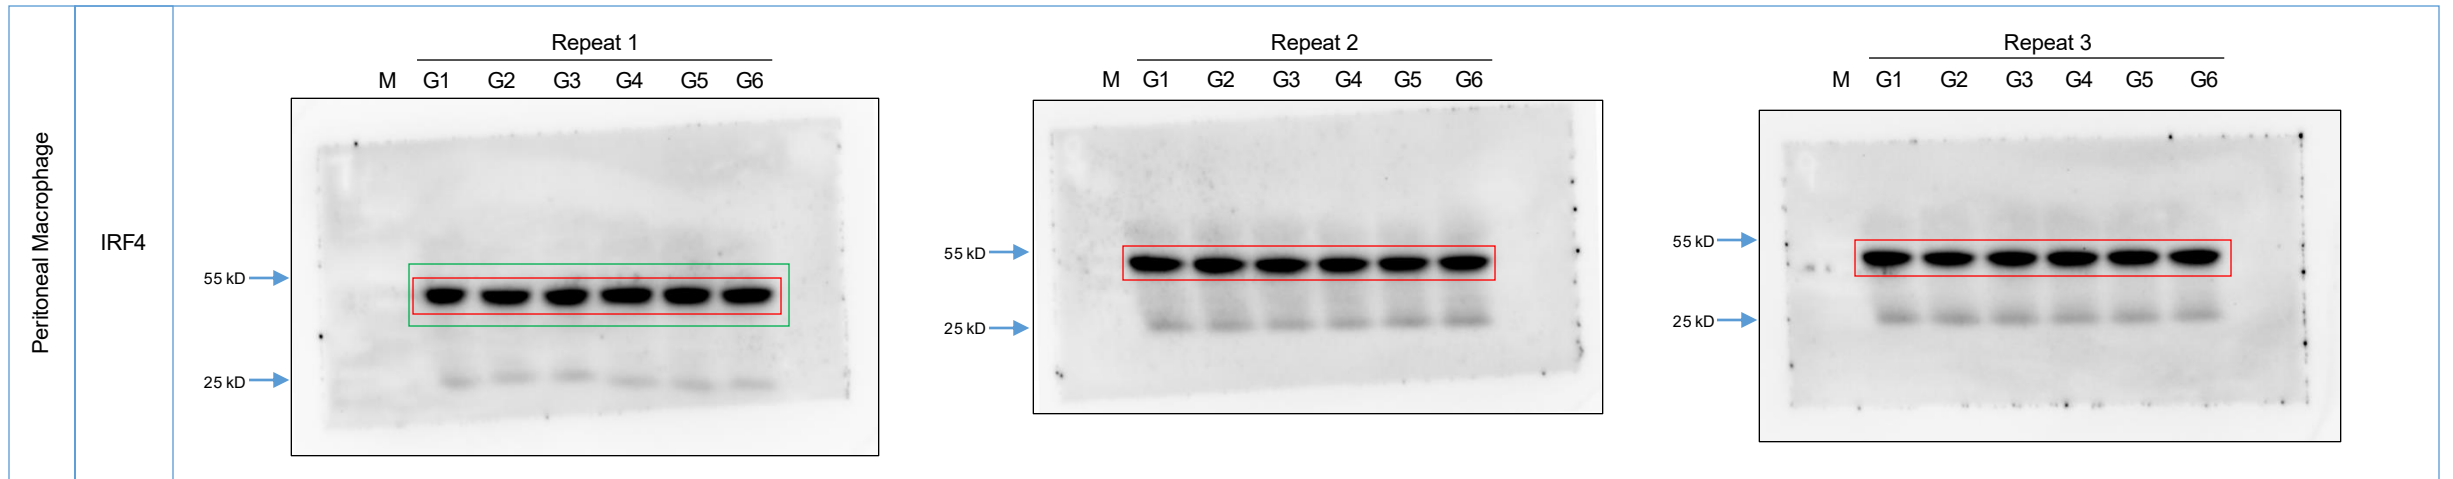

|         | G1 | G2 | G3 | G4 | G5 | G6 |
|---------|----|----|----|----|----|----|
| CLP (h) | 0  | 2  | 4  | 8  | 16 | 24 |

M, Marker

 Target bands

 Representative images presented in Supplemental Figure 1A

# Unedited blot for Supplemental Figure 1

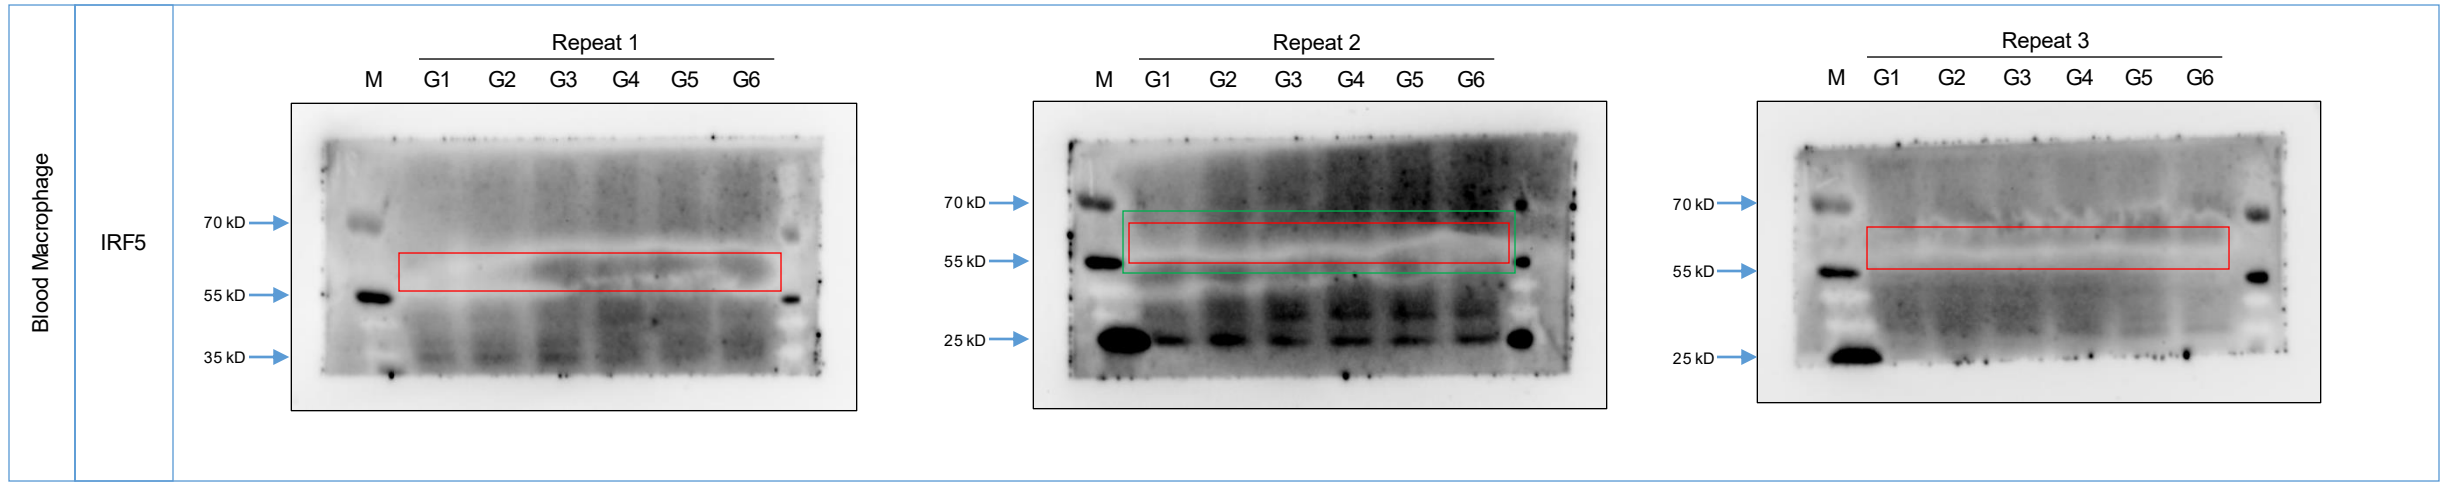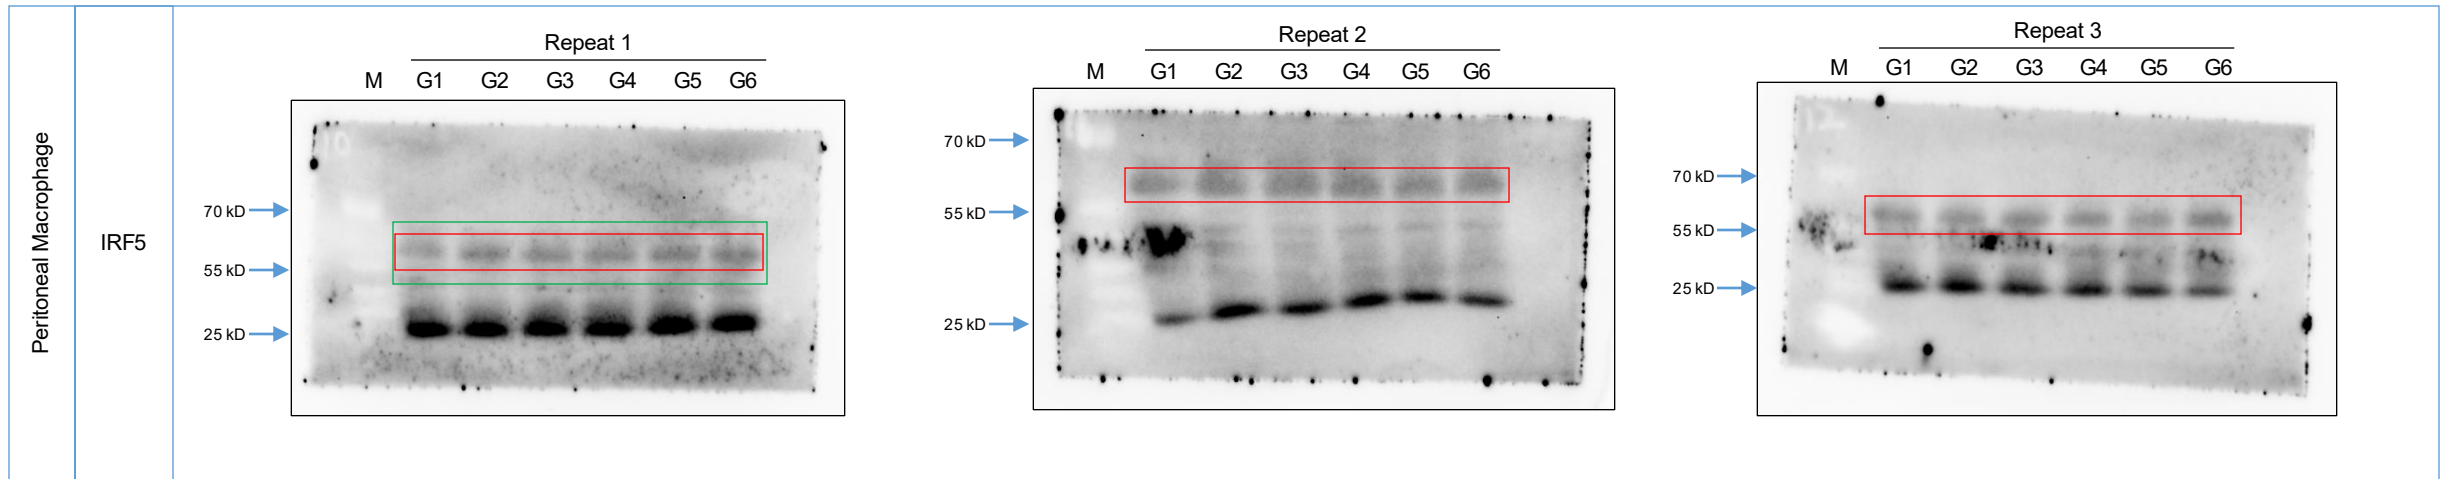

|         | G1 | G2 | G3 | G4 | G5 | G6 |
|---------|----|----|----|----|----|----|
| CLP (h) | 0  | 2  | 4  | 8  | 16 | 24 |

M, Marker

Target bands

Representative images presented in Supplemental Figure 1A

# Unedited blot for Supplemental Figure 1

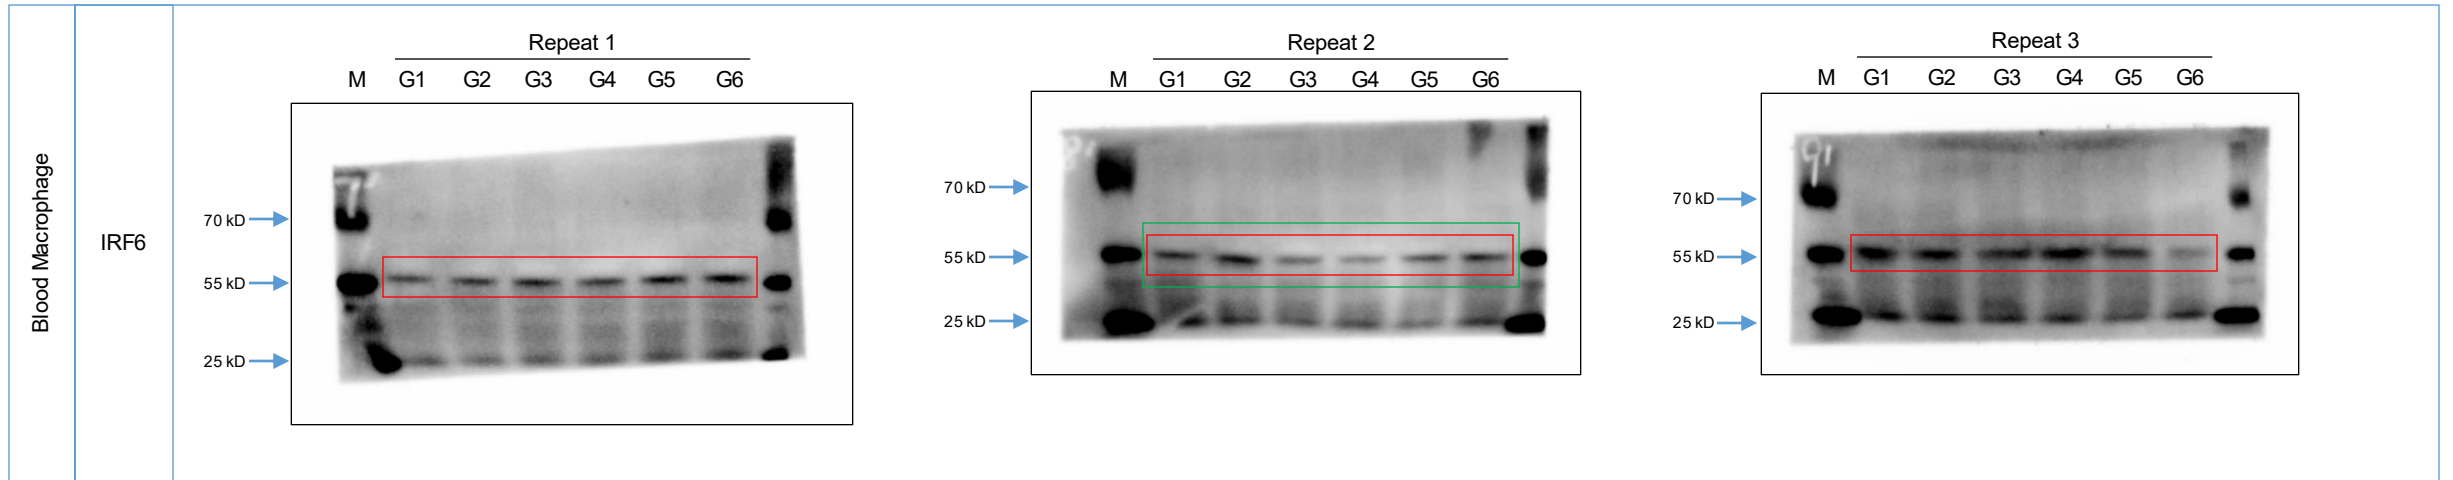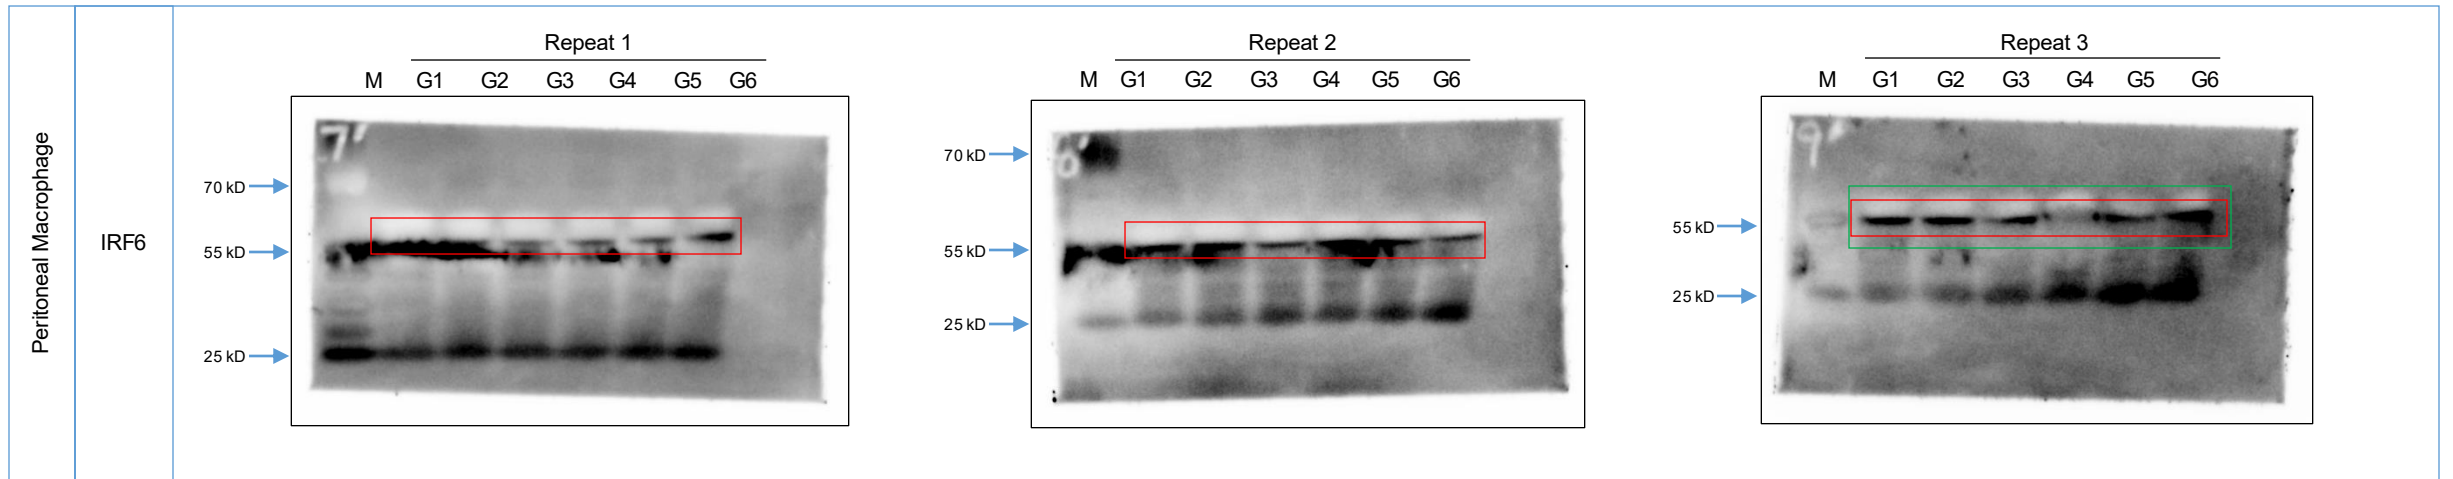

|         | G1 | G2 | G3 | G4 | G5 | G6 |
|---------|----|----|----|----|----|----|
| CLP (h) | 0  | 2  | 4  | 8  | 16 | 24 |

M, Marker

 Target bands

 Representative images presented in Supplemental Figure 1A

# Unedited blot for Supplemental Figure 1

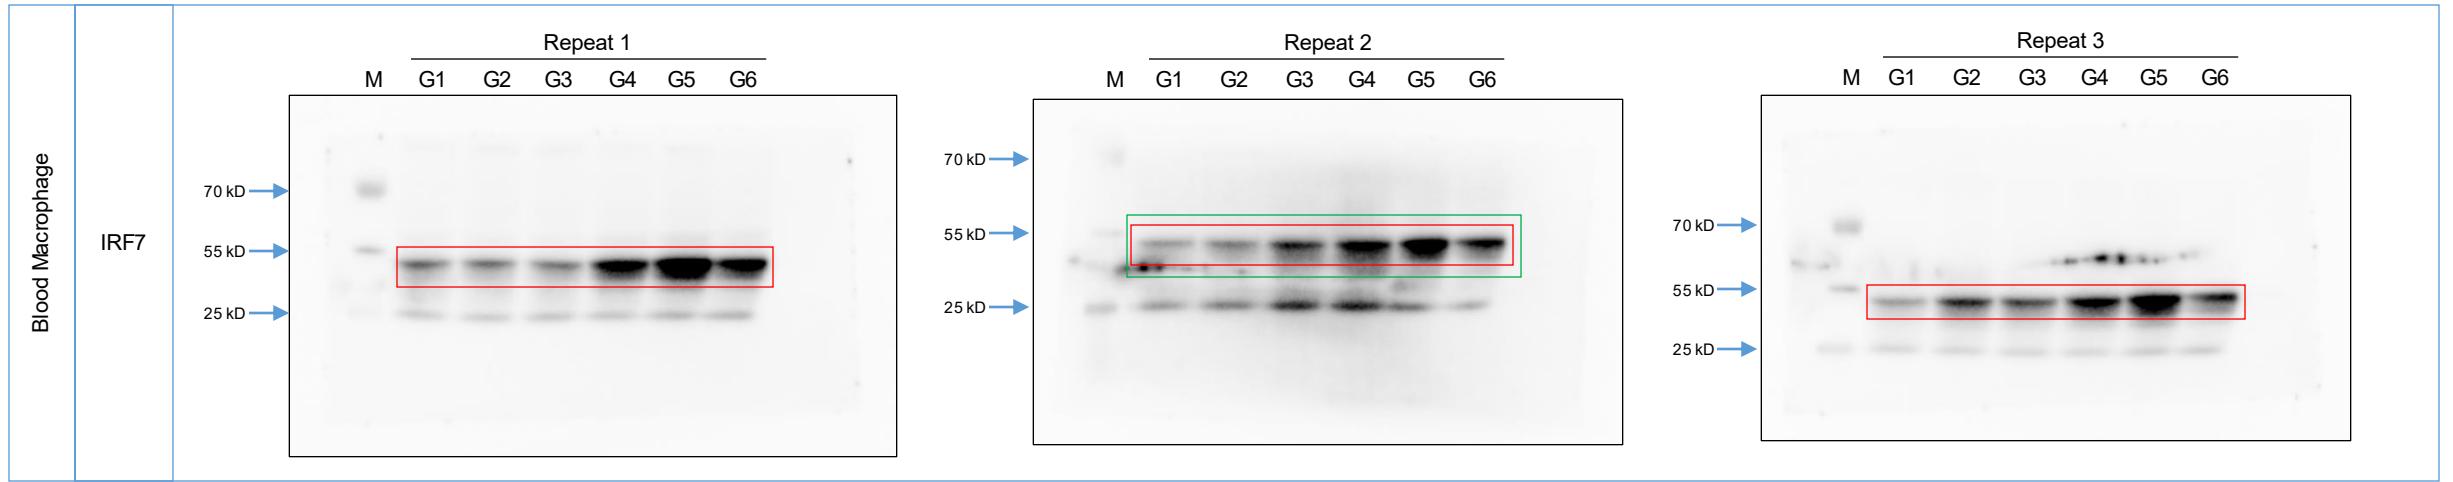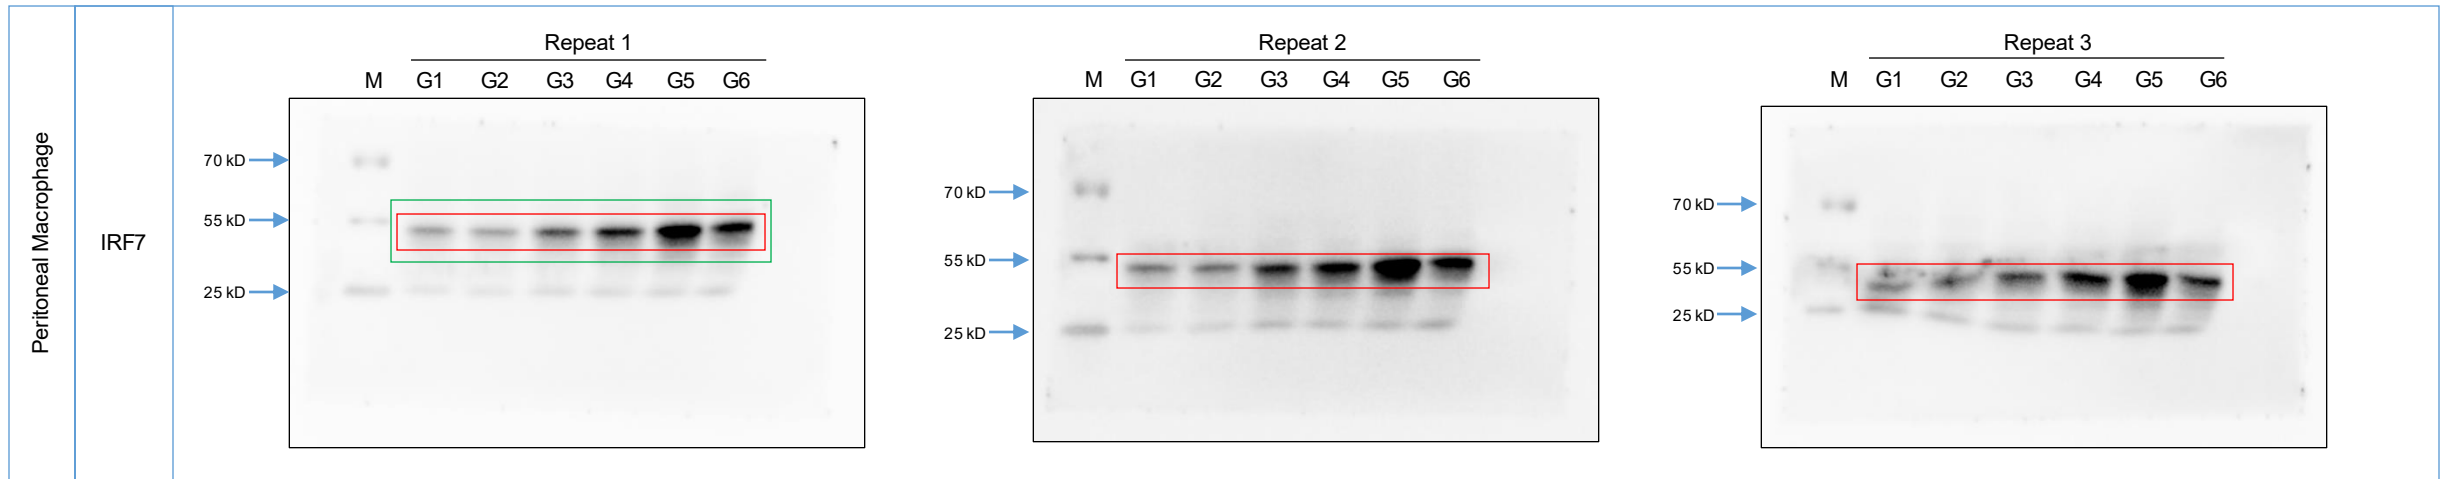

|         | G1 | G2 | G3 | G4 | G5 | G6 |
|---------|----|----|----|----|----|----|
| CLP (h) | 0  | 2  | 4  | 8  | 16 | 24 |

M, Marker

Target bands

Representative images presented in Supplemental Figure 1A

# Unedited blot for Supplemental Figure 1

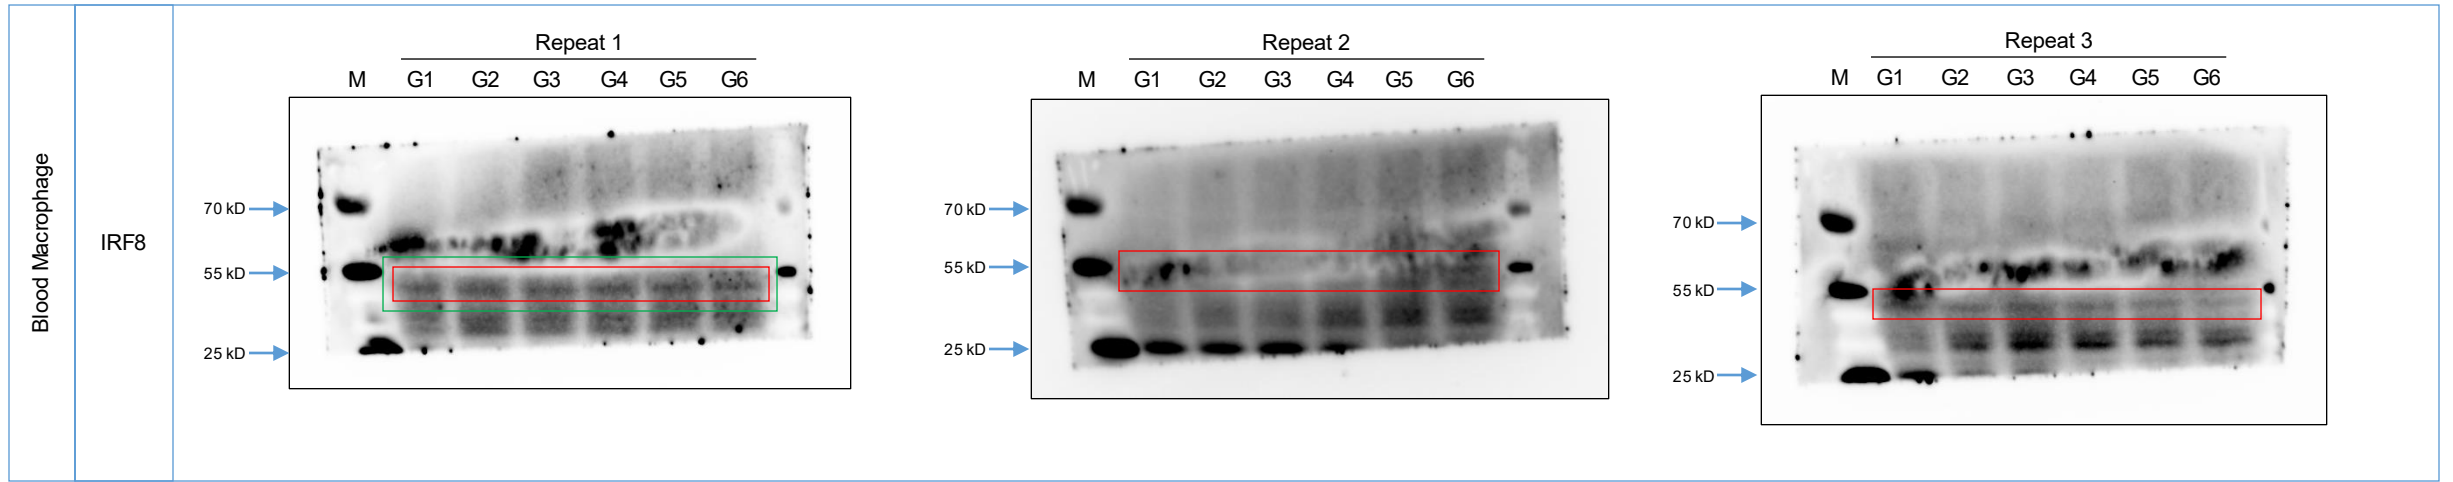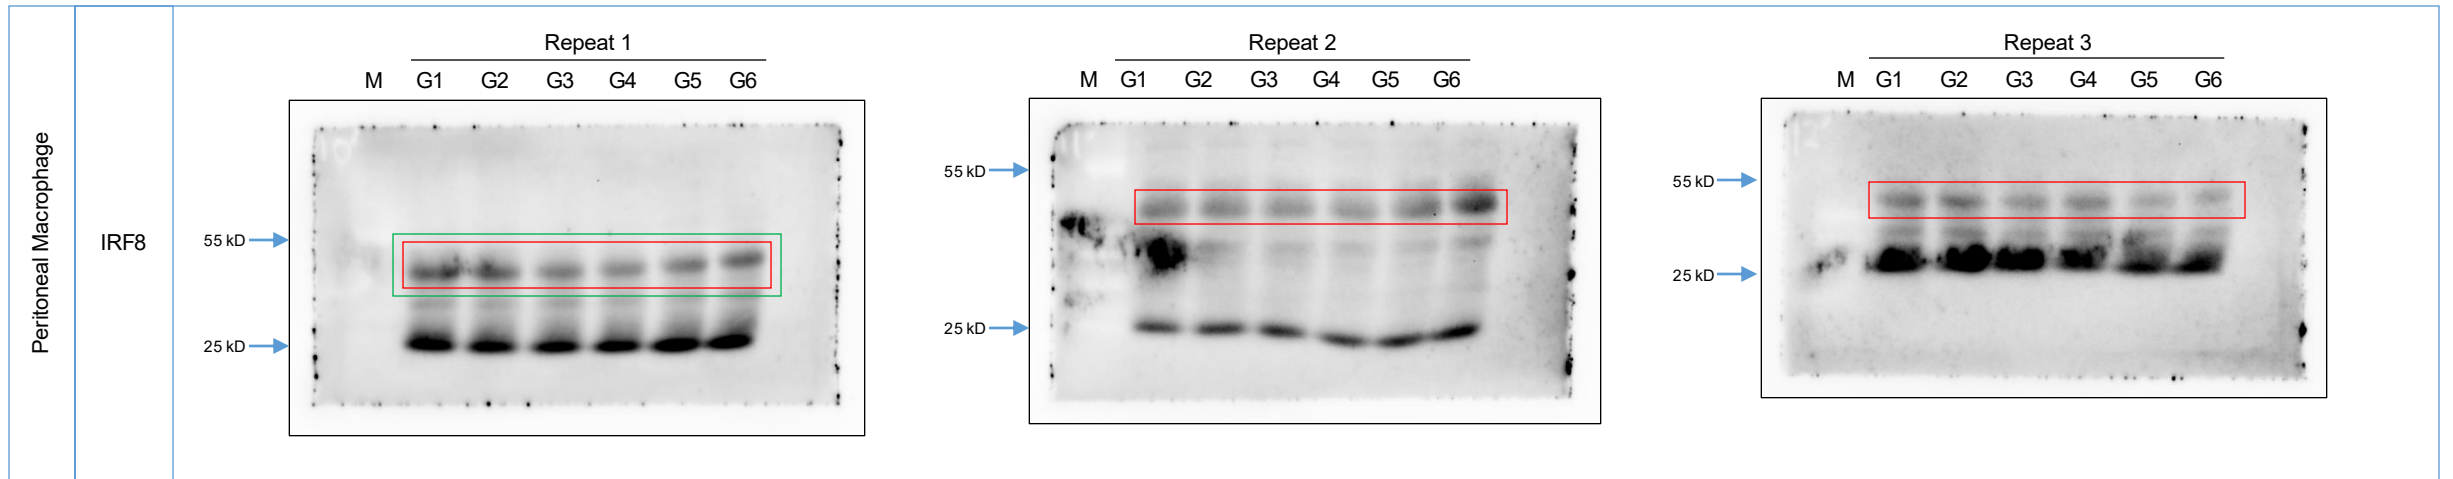

|         | G1 | G2 | G3 | G4 | G5 | G6 |
|---------|----|----|----|----|----|----|
| CLP (h) | 0  | 2  | 4  | 8  | 16 | 24 |

M, Marker

Target bands

Representative images presented in Supplemental Figure 1A

# Unedited blot for Supplemental Figure 1

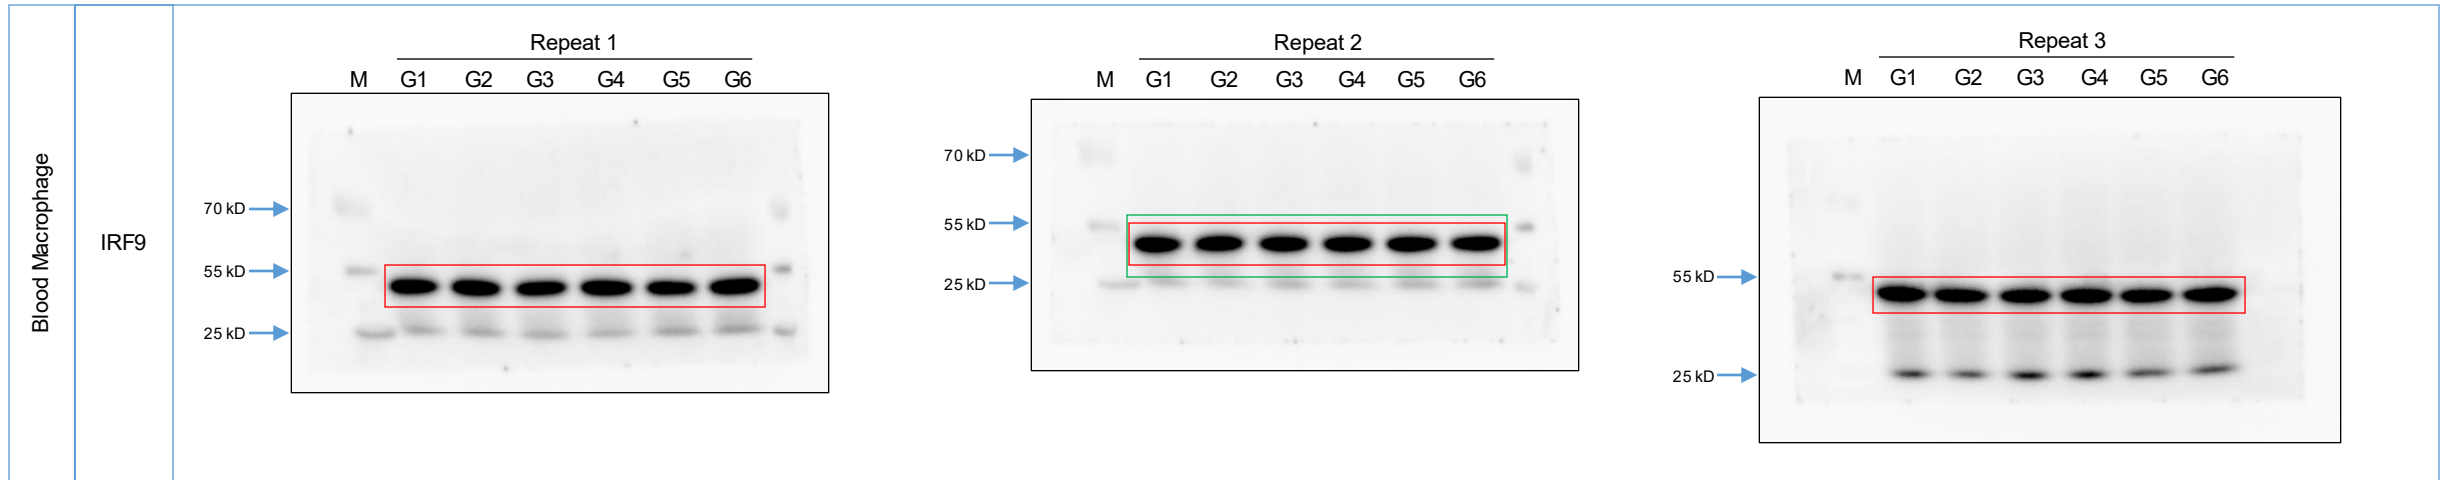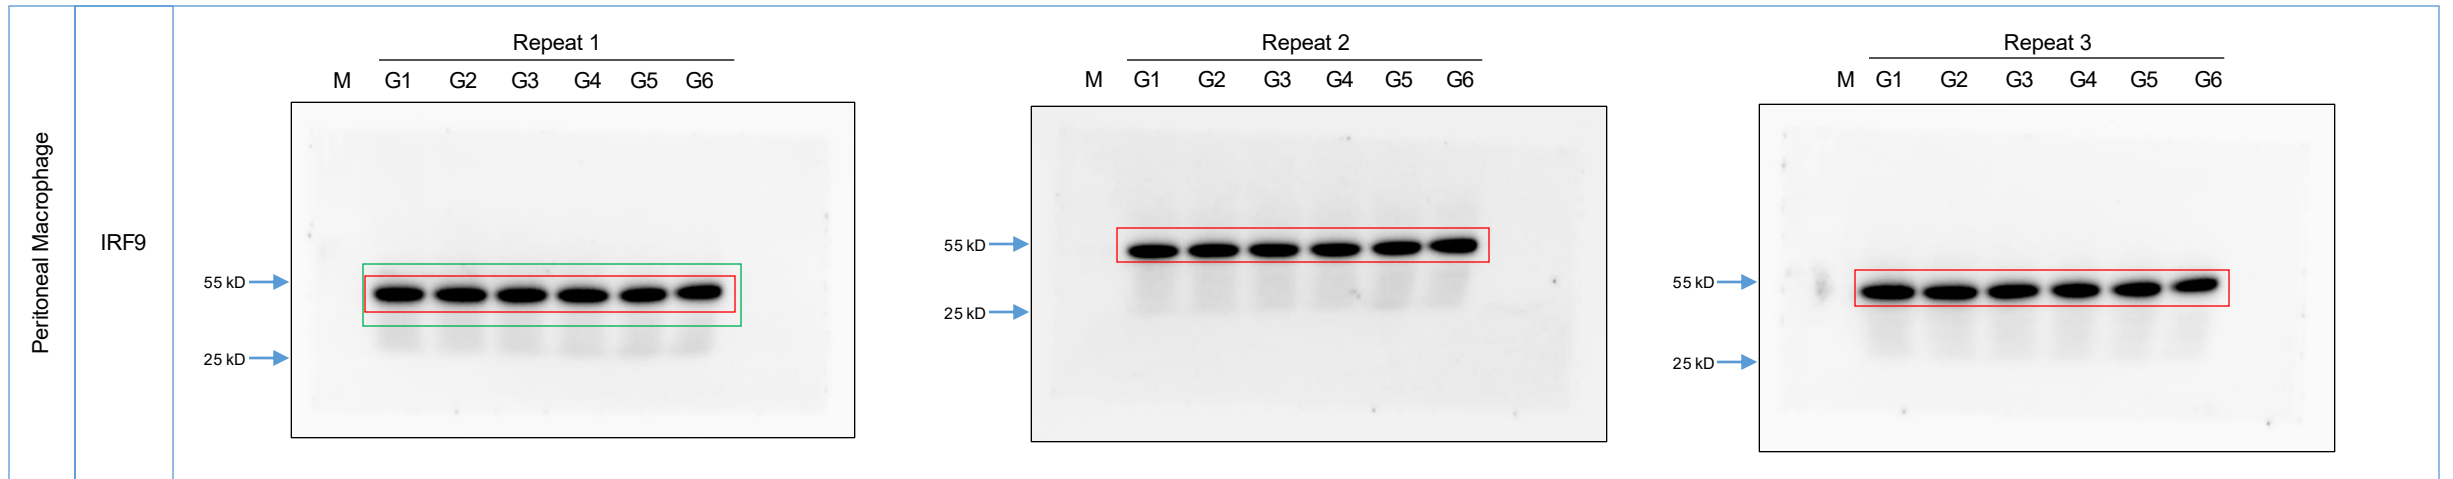

|         |    |    |    |    |    |    |
|---------|----|----|----|----|----|----|
|         | G1 | G2 | G3 | G4 | G5 | G6 |
| CLP (h) | 0  | 2  | 4  | 8  | 16 | 24 |

M, Marker

Target bands

Representative images presented in Supplemental Figure 1A

# Unedited blot for Supplemental Figure 1

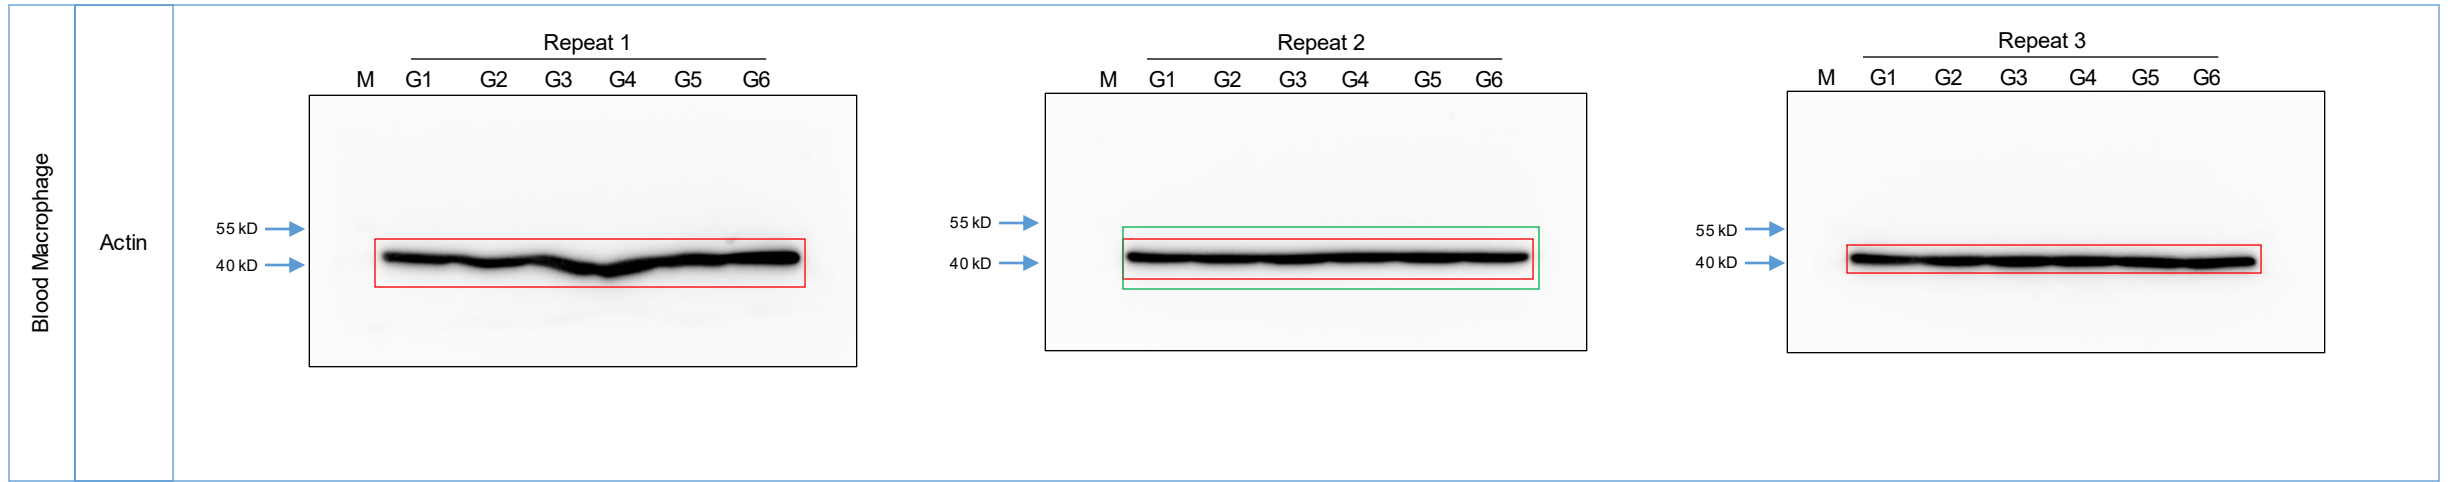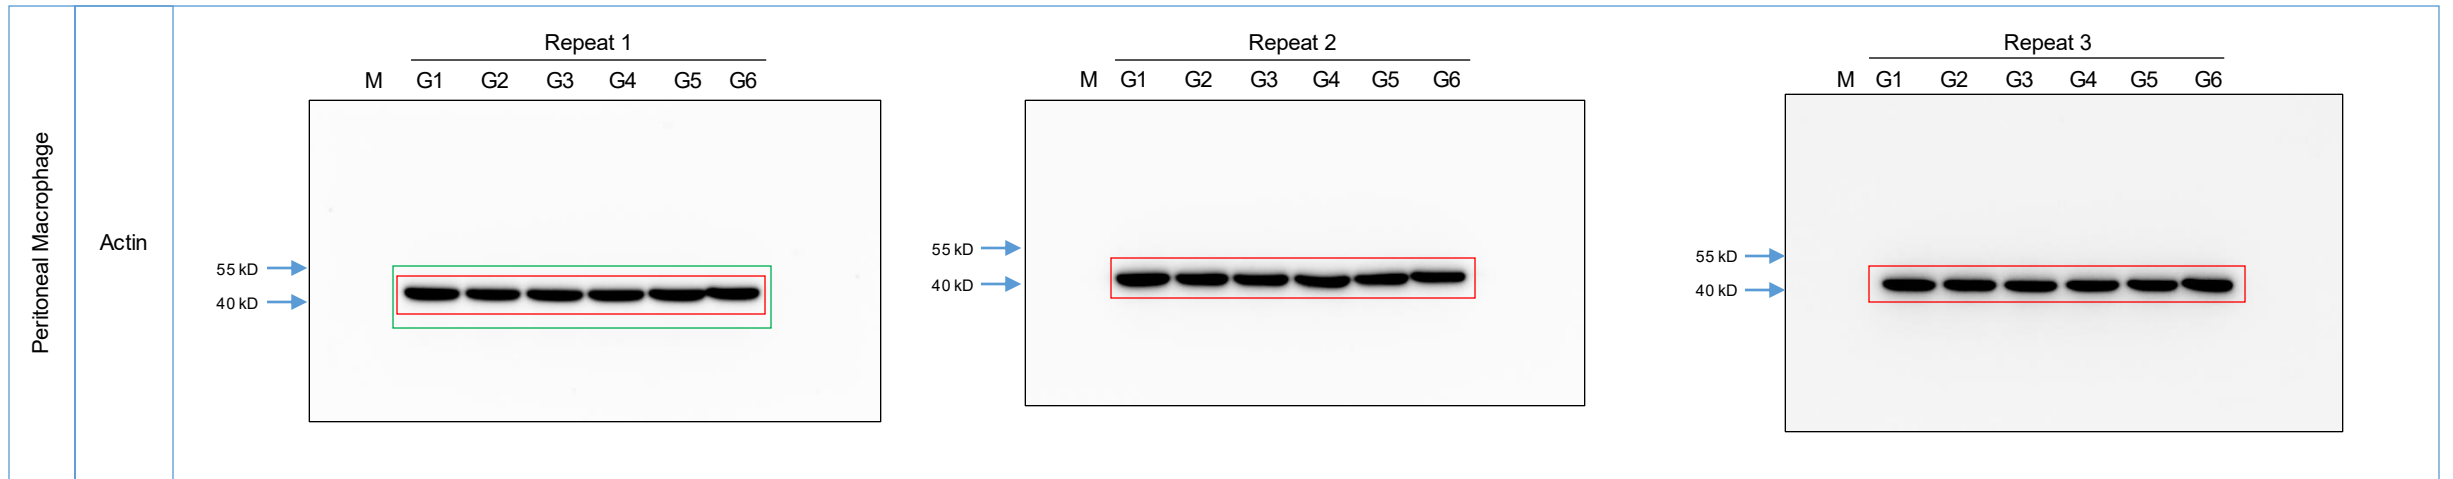

|         |    |    |    |    |    |    |
|---------|----|----|----|----|----|----|
|         | G1 | G2 | G3 | G4 | G5 | G6 |
| CLP (h) | 0  | 2  | 4  | 8  | 16 | 24 |

M, Marker

Target bands

Representative  
images presented  
in Supplemental  
Figure 1A

# Unedited blot for Supplemental Figure 3A, B

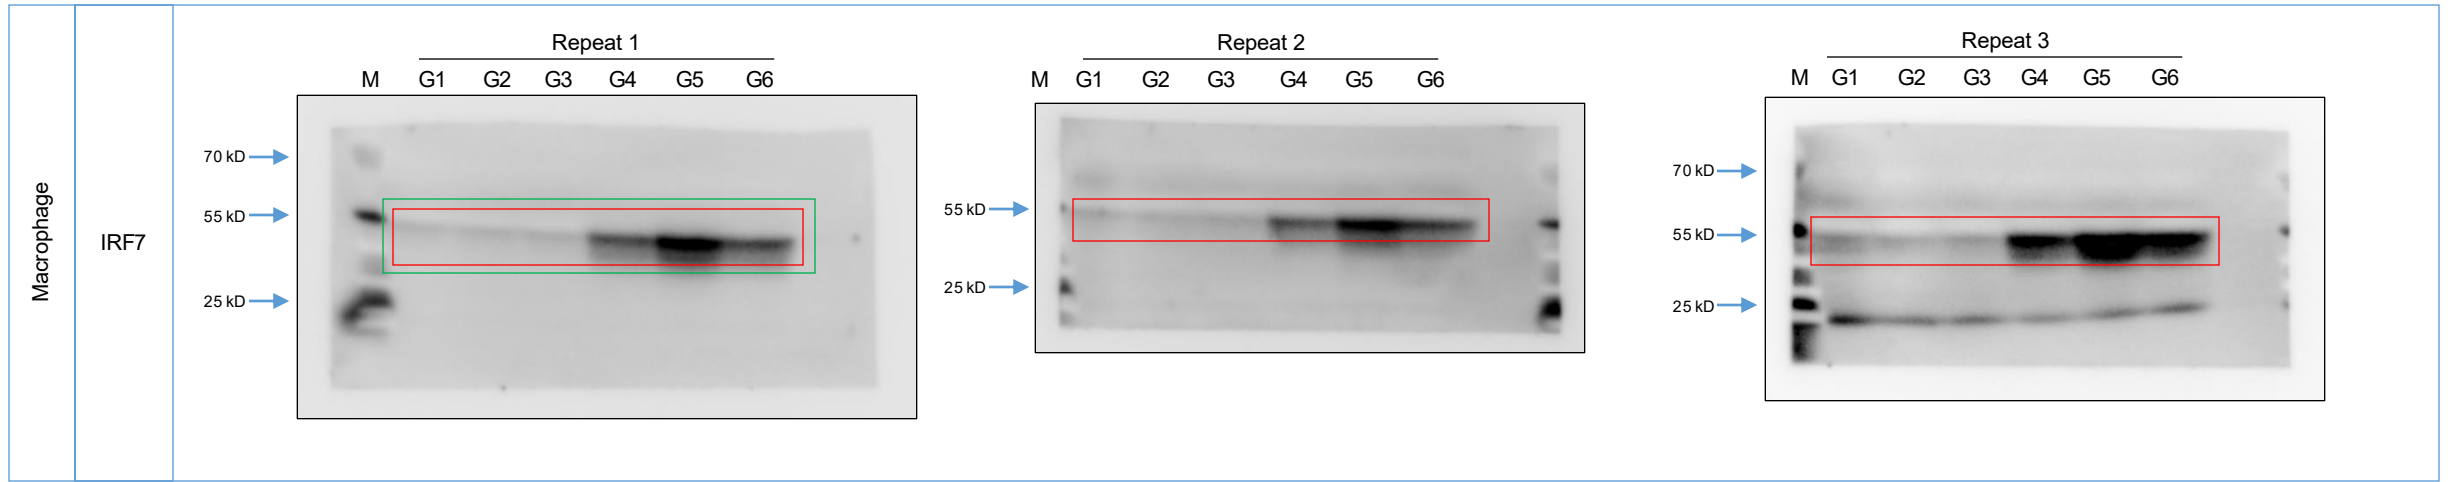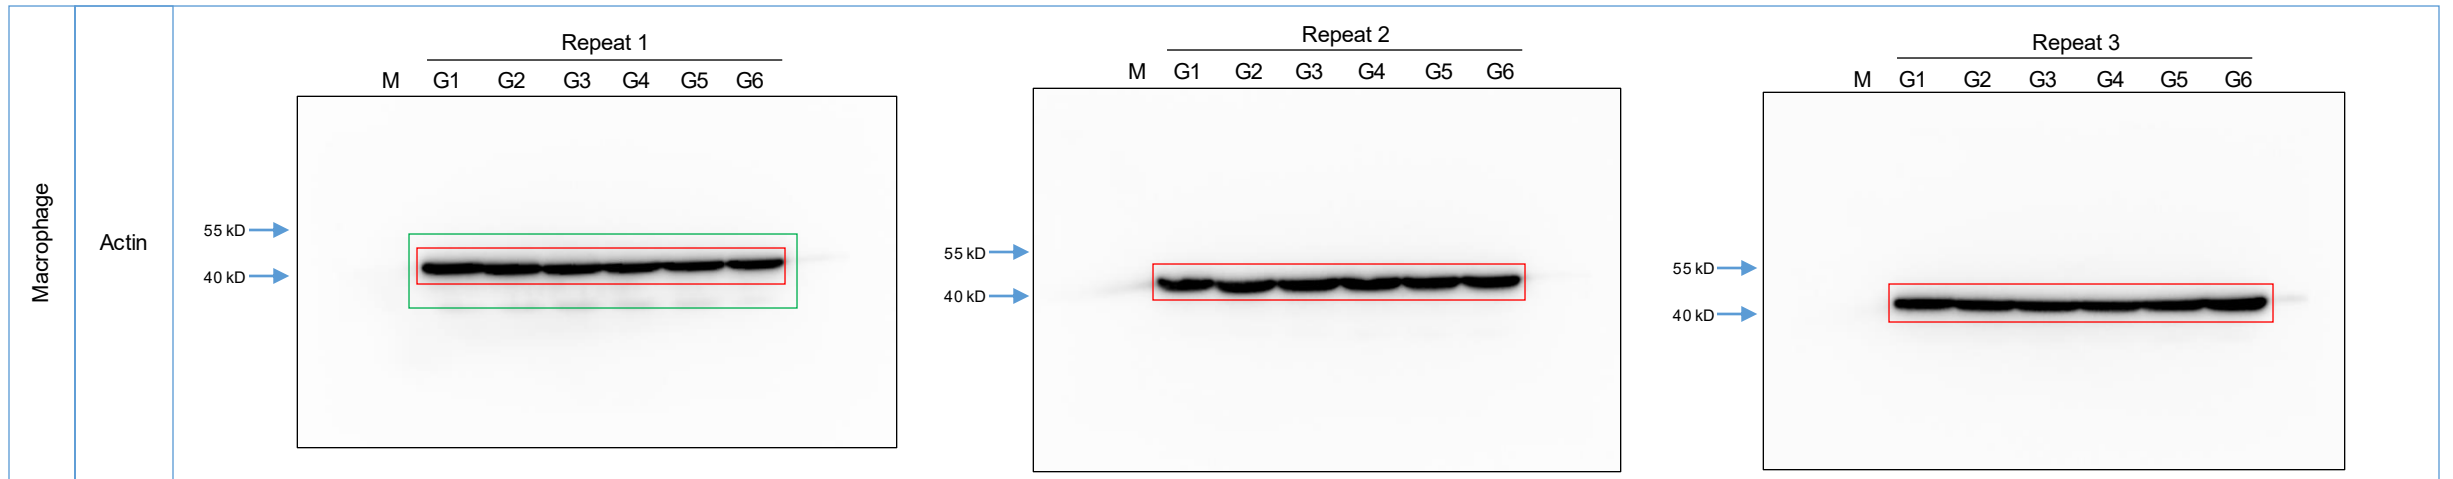

|         |    |    |    |    |    |    |
|---------|----|----|----|----|----|----|
|         | G1 | G2 | G3 | G4 | G5 | G6 |
| CLP (h) | 0  | 2  | 4  | 8  | 16 | 24 |

M, Marker

Target bands

Representative images presented in Supplemental Figure 3A

Unedited blot for Supplemental Figure 3A, B

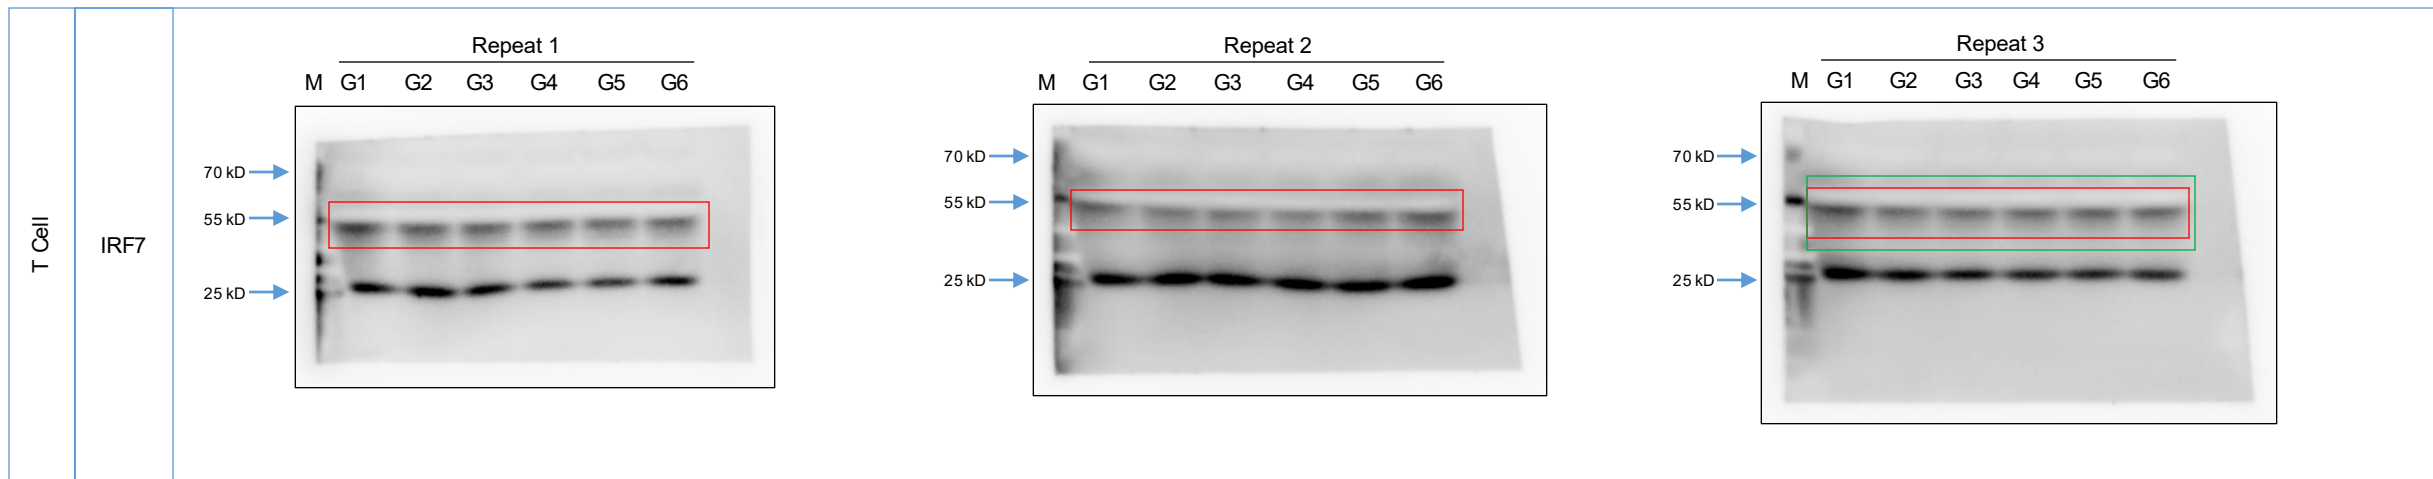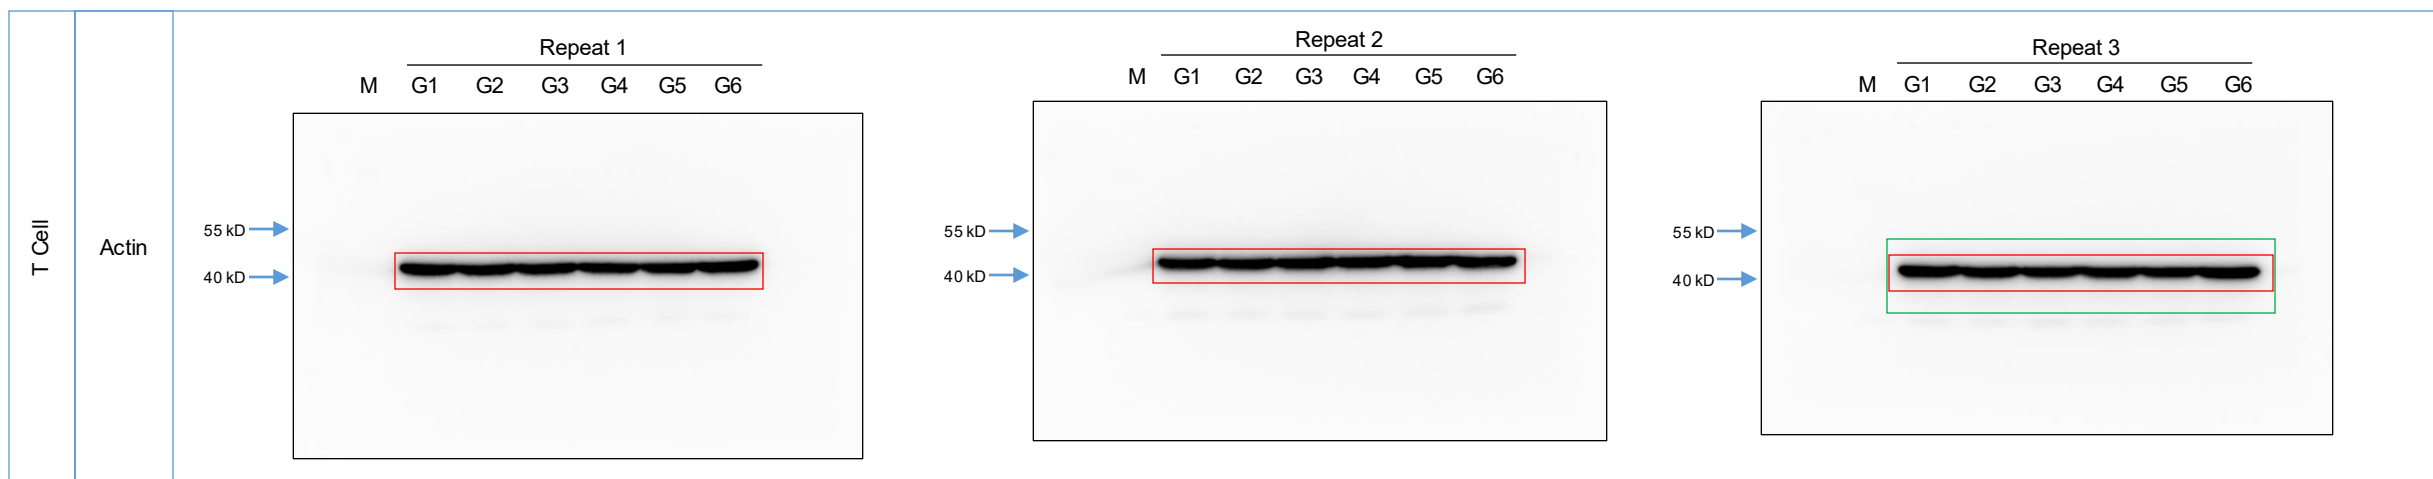

|         | G1 | G2 | G3 | G4 | G5 | G6 |
|---------|----|----|----|----|----|----|
| CLP (h) | 0  | 2  | 4  | 8  | 16 | 24 |

M, Marker

 Target bands

 Representative images presented in Supplemental Figure 3A

# Unedited blot for Supplemental Figure 3A, B

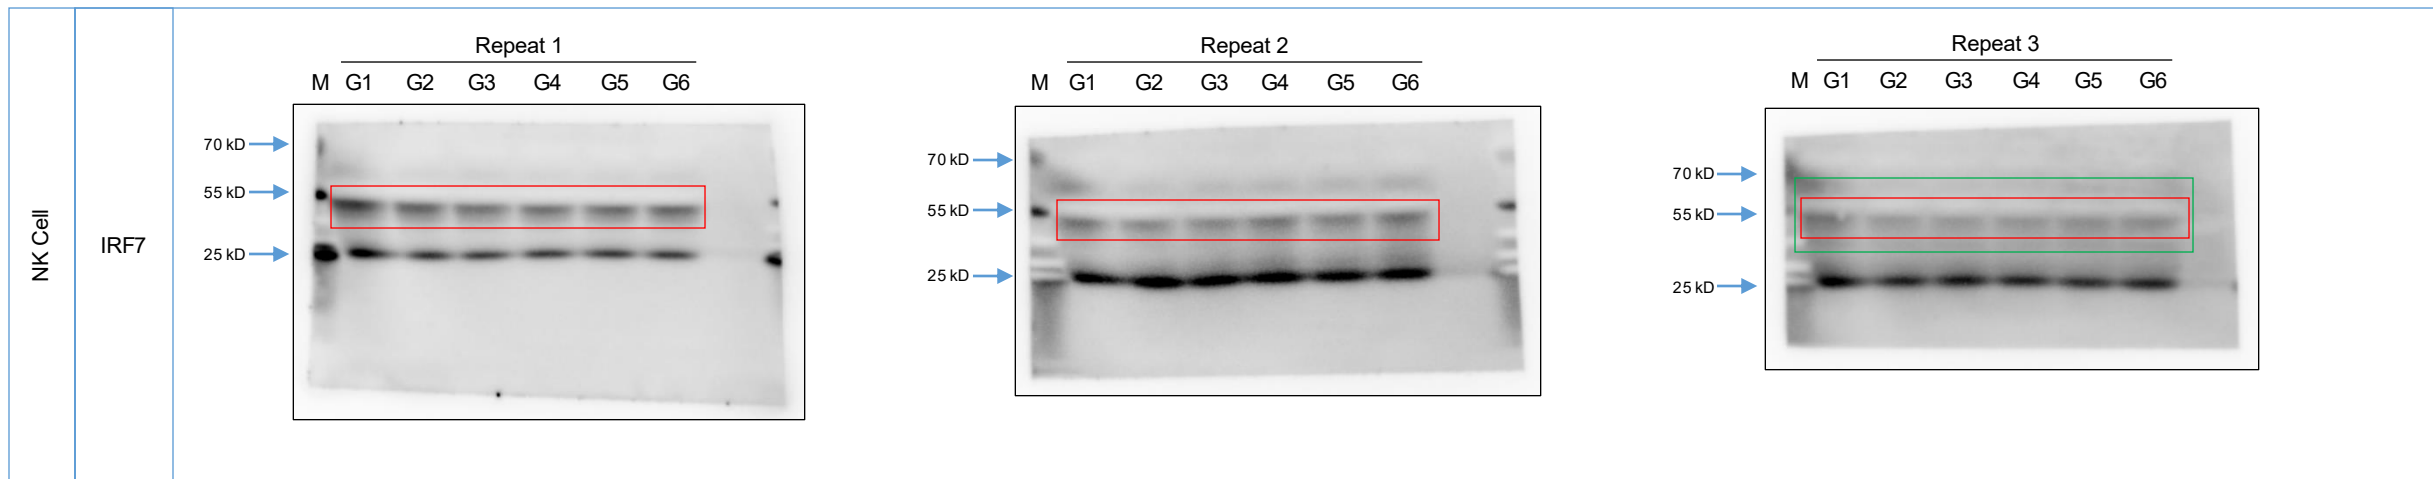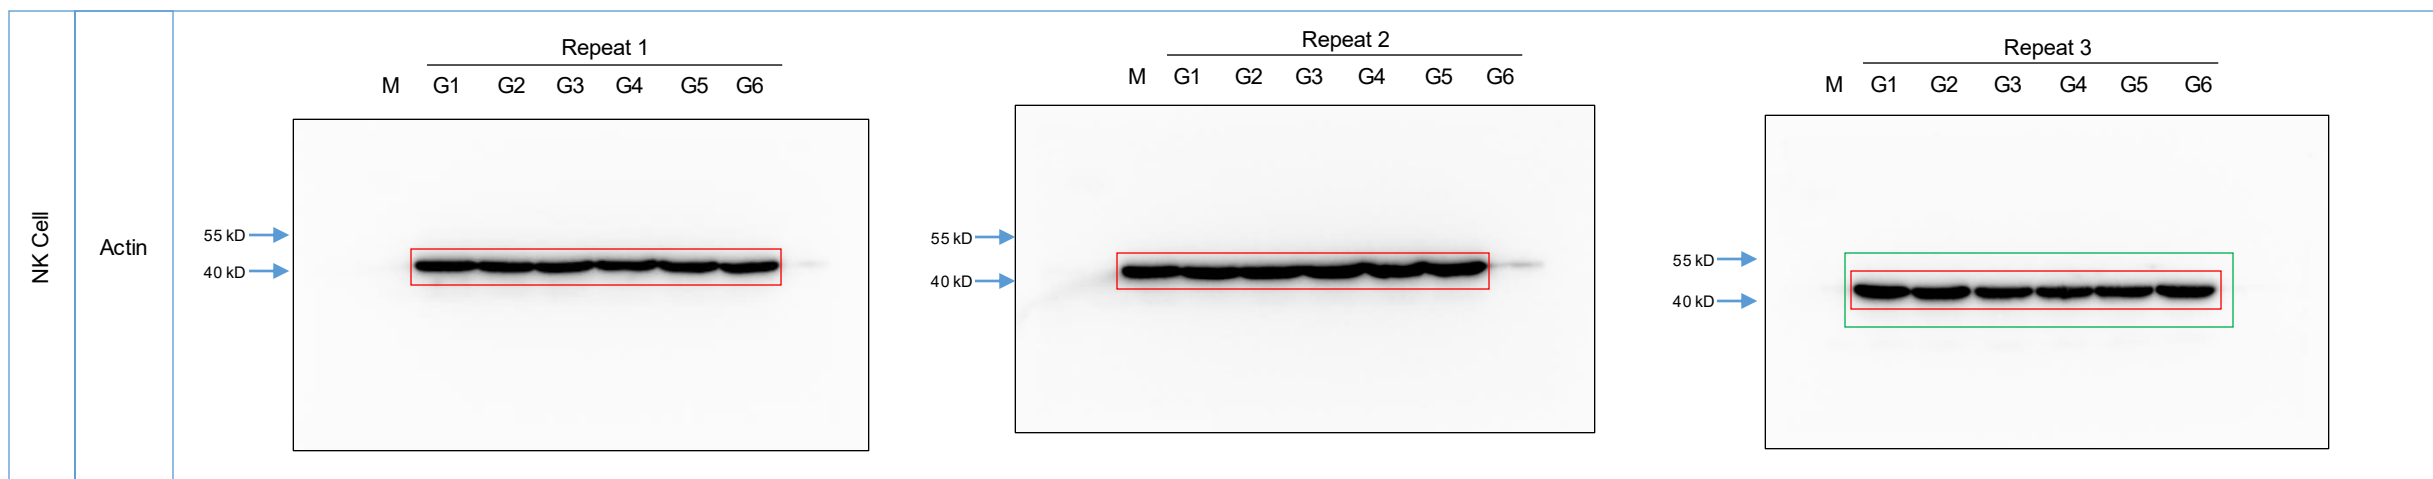

|         |    |    |    |    |    |    |
|---------|----|----|----|----|----|----|
|         | G1 | G2 | G3 | G4 | G5 | G6 |
| CLP (h) | 0  | 2  | 4  | 8  | 16 | 24 |

M, Marker

Target bands

Representative images presented in Supplemental Figure 3A

### Unedited blot for Supplemental Figure 8A

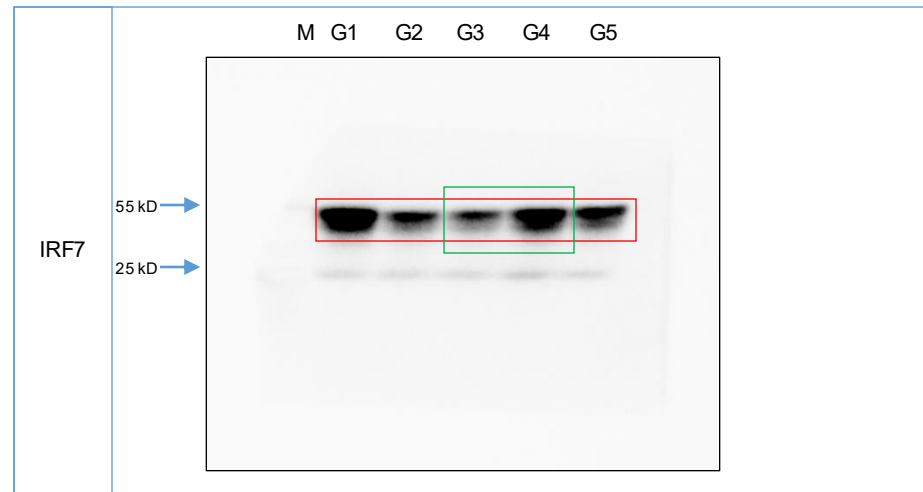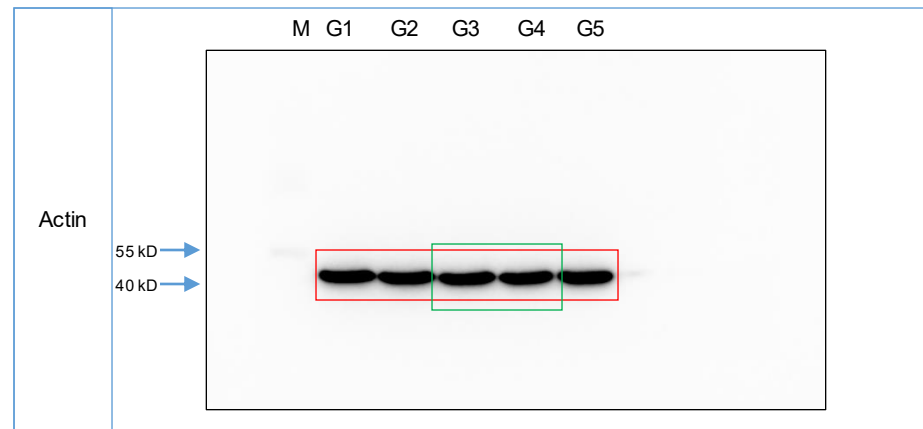

G1, Macrophages from WT mice underwent CLP for 16h  
G2, BMDMs with normal culture  
G3, BMDMs transfected with vector for 48h  
G4, BMDMs transfected with *Irf7* gene for 48h  
G5, BMDMs transfected with *Irf7* gene for 72h

M, Marker       Representative images presented in Supplemental Figure 8A  
 Target bands

### Unedited blot for Supplemental Figure 8B

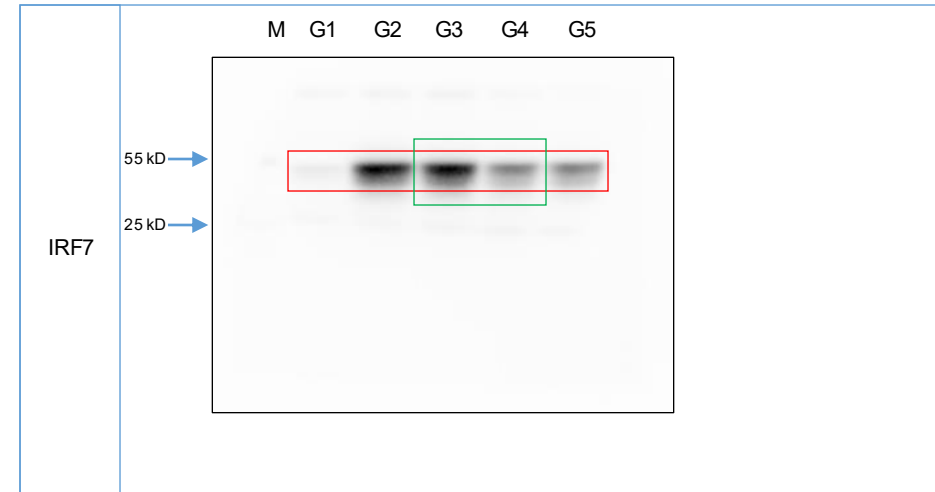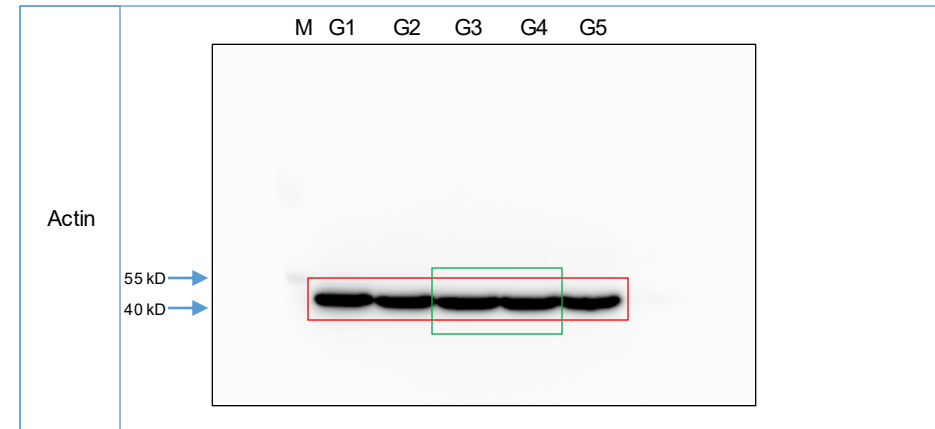

G1, Macrophages from WT mice underwent CLP for 0h  
G2, BMDMs with normal culture  
G3, BMDMs transfected with NC siRNA for 48h  
G4, BMDMs transfected with *Irf7* siRNA for 48h  
G5, BMDMs transfected with *Irf7* siRNA for 72h

M, Marker       Representative images presented in Supplemental Figure 8B  
 Target bands

# Unedited blot for Supplemental Figure 13A

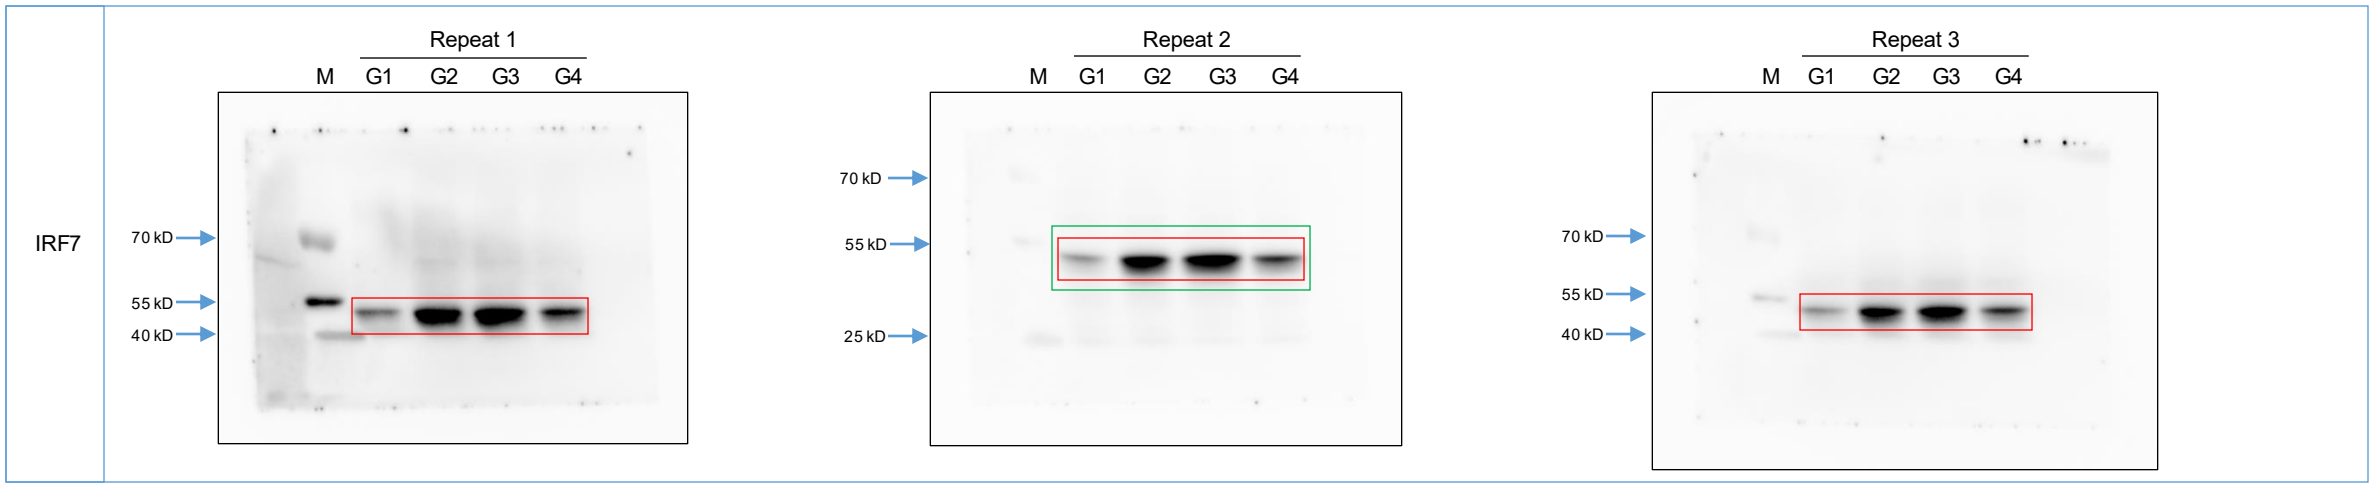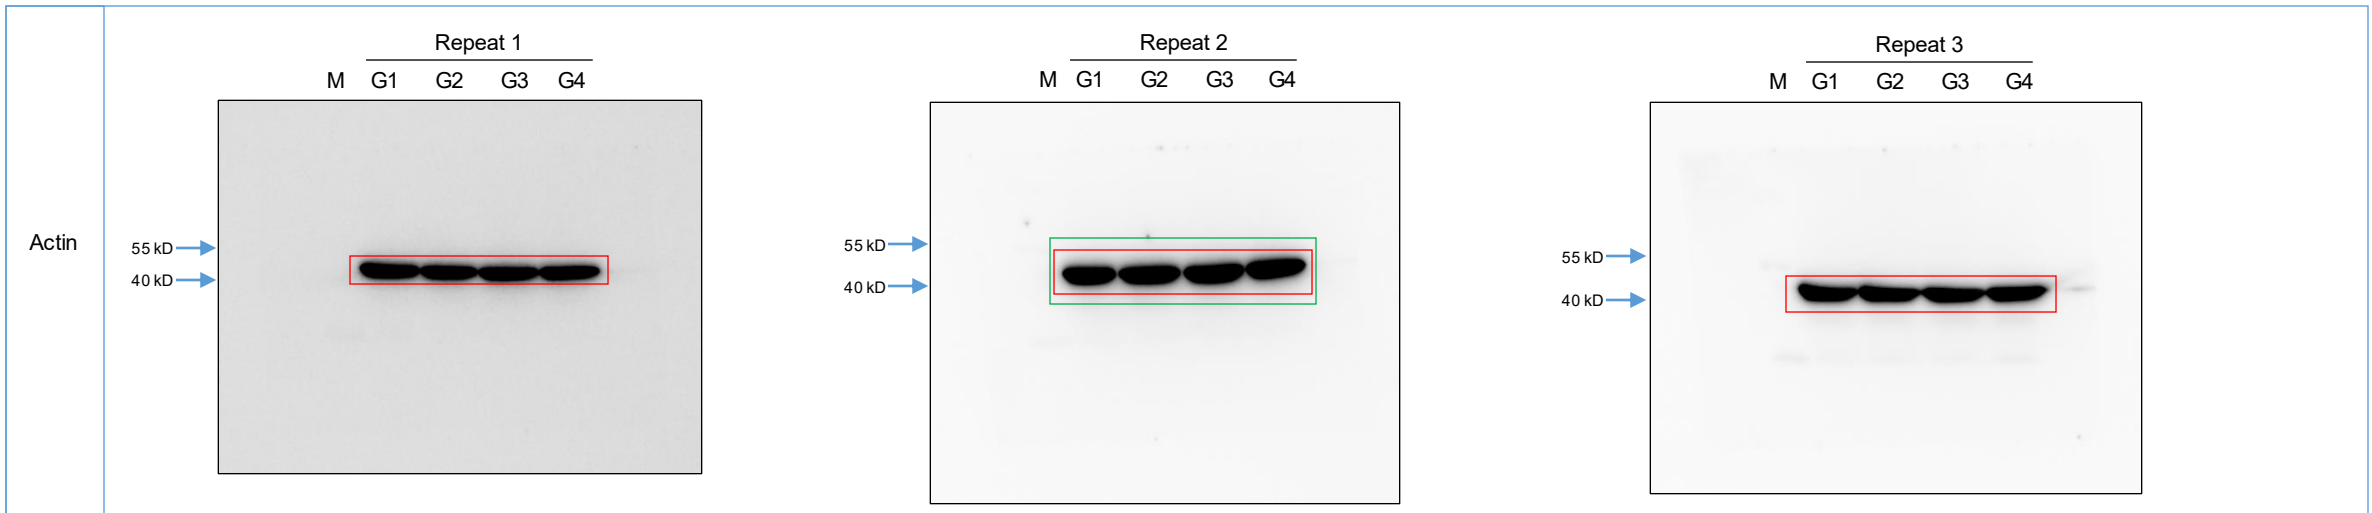

|                 | G1 | G2 | G3 | G4 |
|-----------------|----|----|----|----|
| CLP             | ○  | ●  | ●  | ●  |
| IgG             | ○  | ●  | ○  | ○  |
| IFN $\alpha$ Ab | ○  | ○  | ●  | ○  |
| IFN $\beta$ Ab  | ○  | ○  | ○  | ●  |

M, Marker

Target bands

Representative images presented in Supplemental Figure 13A

Unedited blot for Supplemental Figure 13B

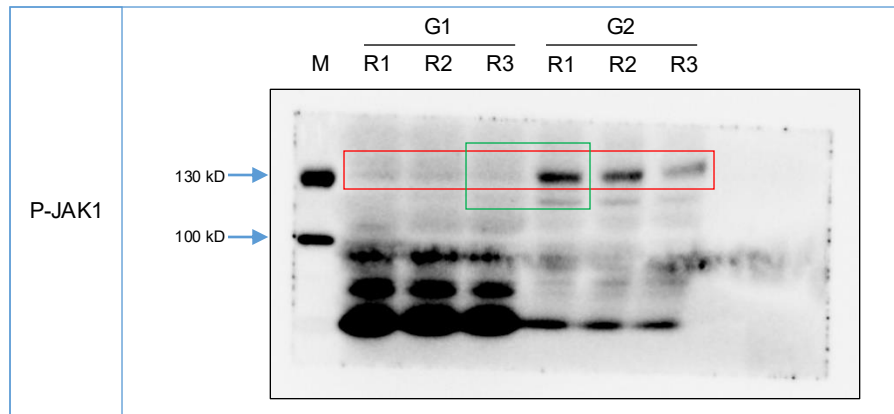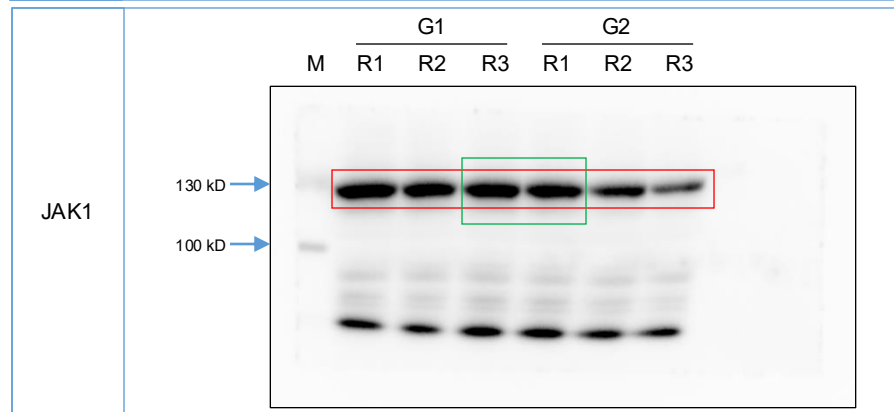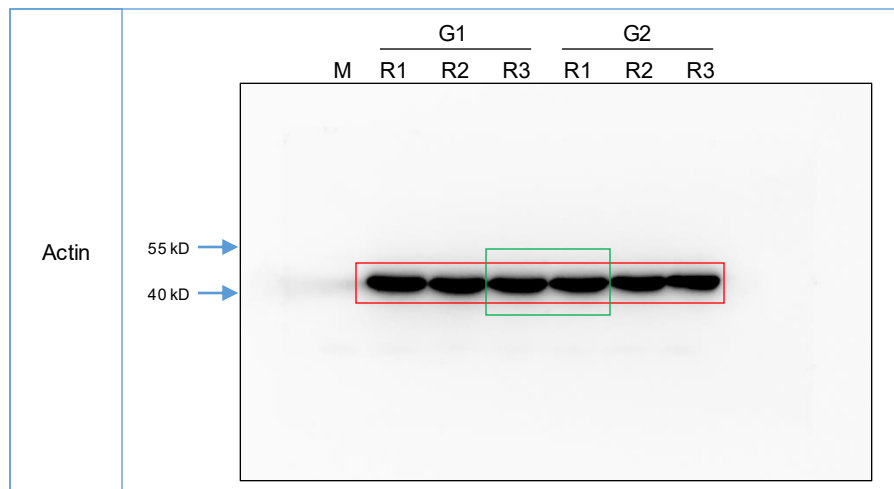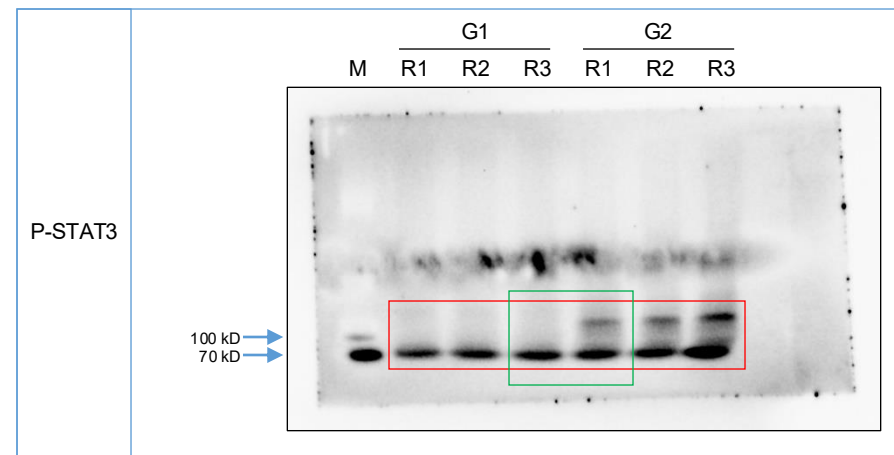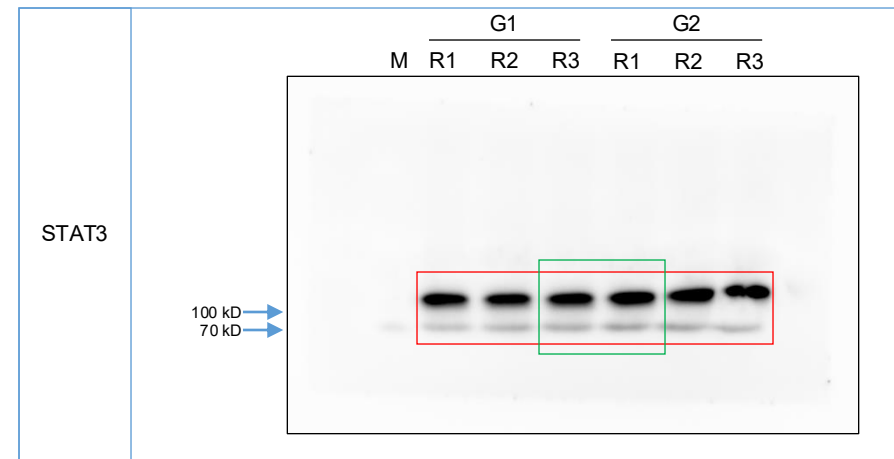

G1, Sham  
G2, CLP  
R1, Replicate 1  
R2, Replicate 2  
R3, Replicate 3

Target bands

Representative  
images presented  
in Supplemental  
Figure 13B

M, Marker

Unedited blot for Supplemental Figure 13C

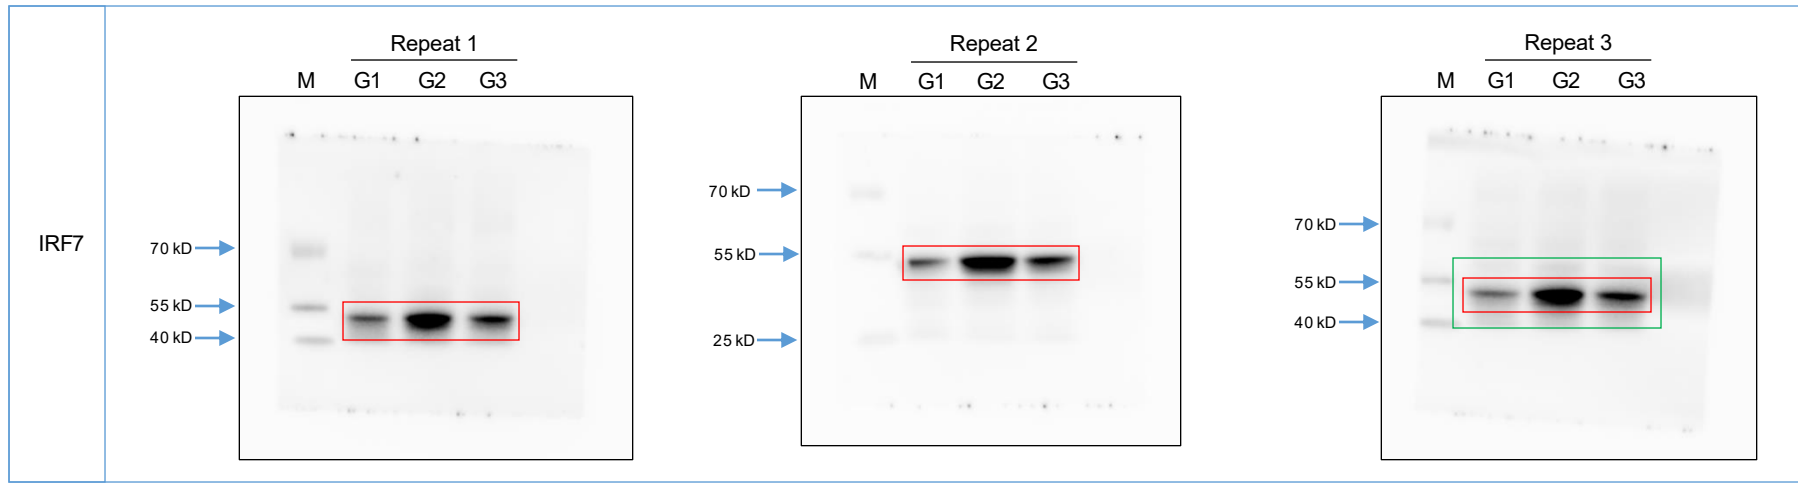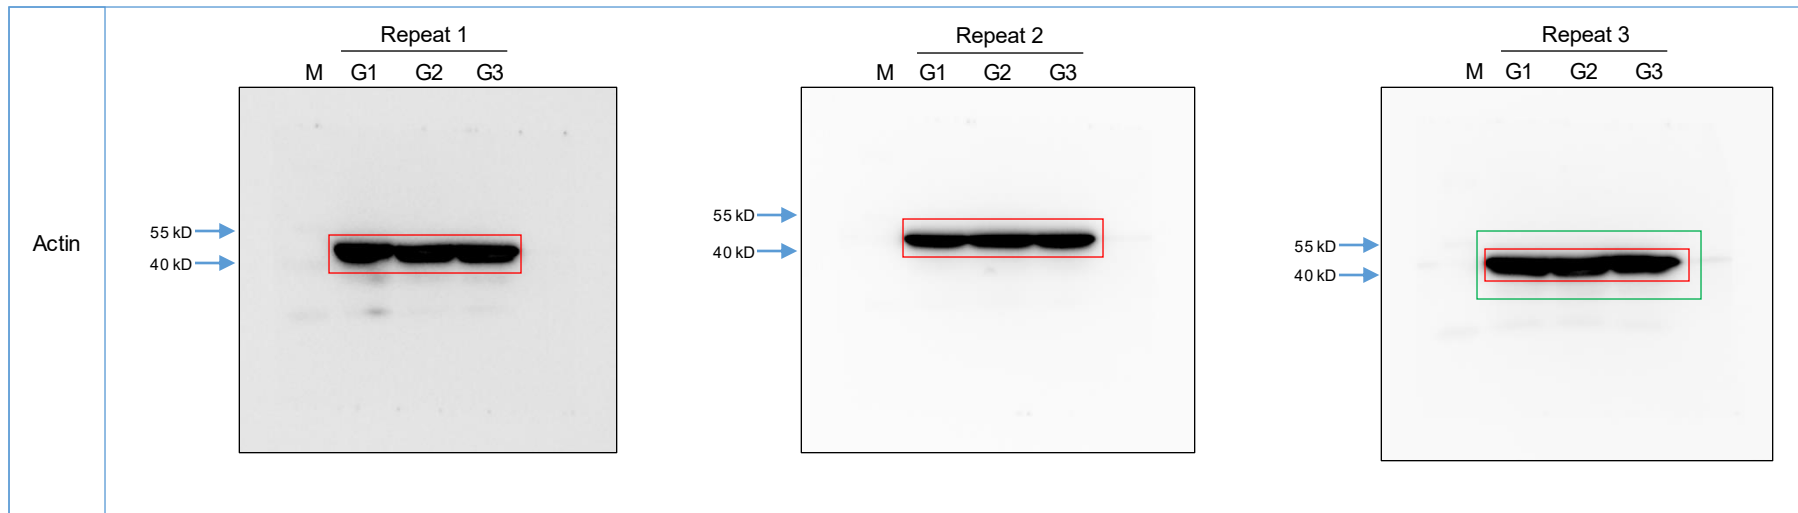

|         | G1 | G2 | G3 |
|---------|----|----|----|
| CLP     | ○  | ●  | ●  |
| Vehicle | ○  | ●  | ○  |
| GLPG    | ○  | ○  | ●  |

M, Marker

Target bands

Representative images presented in Supplemental Figure 13C

Unedited blot for Supplemental Figure 13D

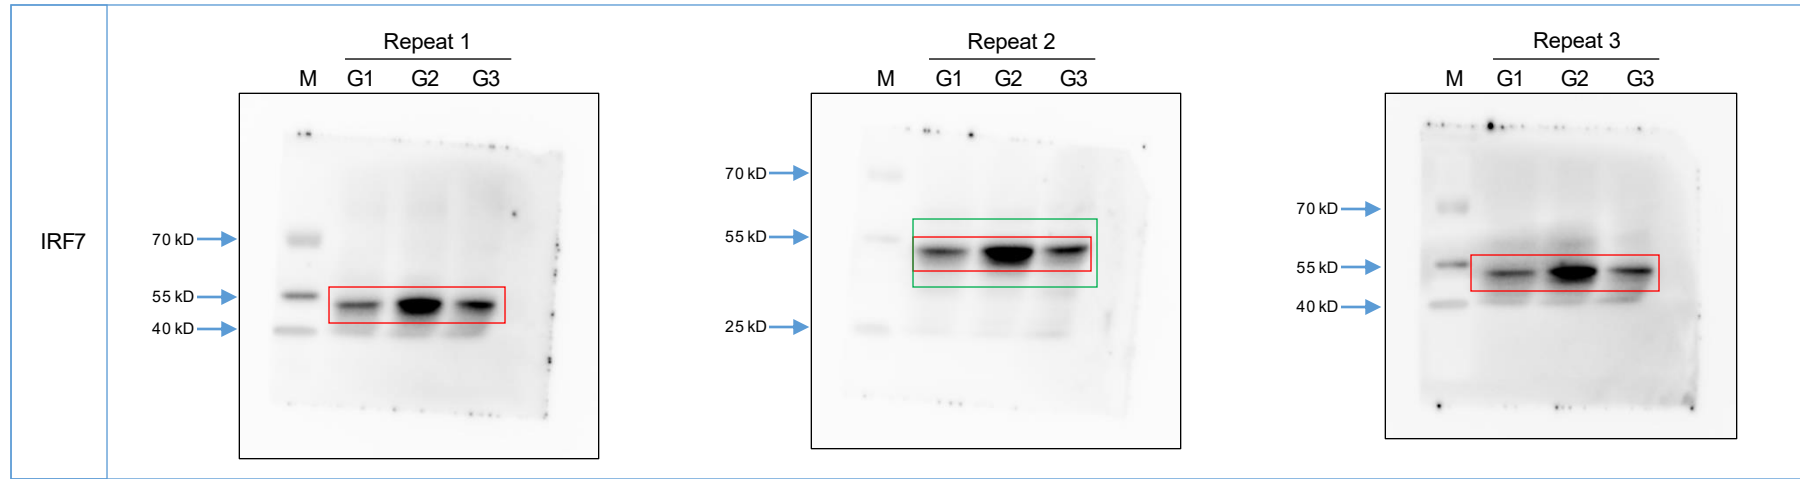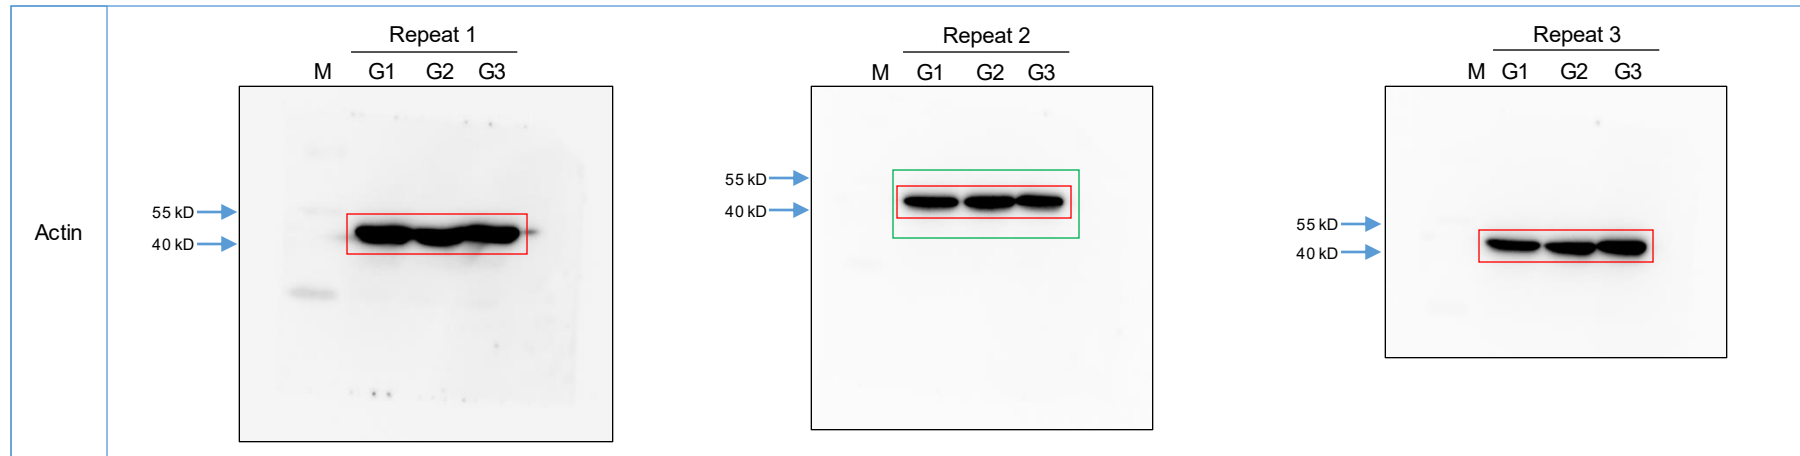

|         | G1 | G2 | G3 |
|---------|----|----|----|
| CLP     | ○  | ●  | ●  |
| Vehicle | ○  | ●  | ○  |
| BP      | ○  | ○  | ●  |

M, Marker

Target bands

Representative images presented in Supplemental Figure 13D
